# Supplementary material
Source: publisher figshare collection journal article supplement (https://gsapubs.figshare.com/articles/dataset/_/22120331)
Supplement: Supplementary file 1 [file 1]

## Sheet: Table S1
Table S1. Selected published whole-rock major and trace elements data for the post-collisional late-stage granitoids from the Dabie orogen that used for comparative and Sr-Nd-Hf isotope analysisa.
References	Xu et al. (2005) APS	Xu et al. (2005) APS	Xu et al. (2005) APS	Xu et al. (2005) APS	Xu et al. (2005) APS	Xu et al. (2005) APS	Xu et al. (2005) APS	Xu et al. (2005) APS	Xu et al. (2005) APS	Xu et al. (2005) APS	Zhao et al. (2007) Lithos	Zhao et al. (2007) Lithos	Zhao et al. (2007) Lithos	Zhao et al. (2007) Lithos	Zhao et al. (2007) Lithos	Zhao et al. (2007) Lithos
Categorize	LG	LG	LG	LG	LG	LG	LG	LG	LG	LG	LG	LG	LG	LG	LG	LG
Location	Tianzhushan	Tianzhushan	Yuexi-Qianshan	Yuexi-Qianshan	Yuexi-Qianshan	Linchang	Linchang	Tianzhushan	Tianzhushan	Tianzhushan	Zhubuyuan	Zhubuyuan	Zhubuyuan	Shiguan	Miaodaoshan	Miaodaoshan
Region	NDB	NDB	NDB	NDB	NDB	NDB	NDB	NDB	NDB	NDB	NDB	NDB	NDB	NDB	CDB	CDB
Longitude (°E)	116.318	116.318	116.367	116.343	116.386	116.435	116.434	116.453	116.457	116.486	116.386	116.354	116.358	116.37	116.064	116.066
Latitude (°N)	30.8442	30.8442	30.8069	30.7617	30.7236	30.7561	30.7458	30.7406	30.7322	30.7461	30.9492	30.9008	30.9197	30.9198	30.821	30.822
Age											128		126		130
1ϭ											3		5		10
Sample NO.	03TZ02	03TZ03	03TZ05	03TZ08	03TZ10	03TZ12	03TZ14	03TZ17	03TZ20	03TZ22	01ZBY02	01ZBY13	01ZBY15	02SG02	02TL01	02TL02
Rock type	Granite	Granodiorite	Quartz monzonite	Granite	Granite	Granite	Granite	Granite	Granite	Granite	Diorite	Granodiorite	Monzonite	Monzonite	Monzodiorite	Quartz monzonite
SiO2	78.3495	65.8889	62.8372	69.5383	76.348	75.5427	75.5995	78.5007	77.1854	78.1387	62.7246	67.7628	60.3596	61.183	55.5095	68.2325
TiO2	0.0703047	0.617487	0.666332	0.454169	0.181182	0.170843	0.120573	0.120569	0.110566	0.150614	0.80313	0.484164	0.950143	0.839232	1.14759	0.466721
Al2O3	12.1928	15.7409	16.7189	14.9775	12.7331	13.2956	13.5947	11.7756	12.0919	11.8684	16.6148	15.7051	17.1945	16.8251	20.6248	15.5235
(Fe2O3)T	0.398376	4.75516	5.02746	2.94912	1.08481	0.921165	0.657547	0.711108	0.852115	0.946038	5.77251	3.89348	7.04945	6.11729	7.38498	3.31778
MnO	0.0401741	0.101227	0.0908635	0.0605559	0.0402626	0.0401983	0.0502389	0.0502372	0.0603089	0.0602457	0.09035	0.0504337	0.0919493	0.091001	0.0637552	0.0811688
MgO	0.120522	2.21688	2.37255	1.26158	0.342232	0.271339	0.18086	0.160759	0.180927	0.21086	2.26885	1.39197	2.91173	2.31547	2.7096	1.21753
CaO	0.54235	3.97824	4.63404	2.71492	1.07703	0.904462	0.783727	0.351661	0.502574	0.481966	4.49754	2.8949	3.05476	4.75228	4.94103	2.53653
Na2O	3.84667	4.09971	3.75569	3.71409	3.3116	3.77864	3.85835	3.65727	4.07085	3.65491	4.24656	3.79262	4.75072	4.33771	4.08033	4.54545
K2O	4.42919	2.39909	3.66483	4.16826	4.82145	5.03484	5.12437	4.66202	4.92523	4.46822	2.67041	3.85314	3.25909	3.20526	2.95399	3.90625
P2O5	0.0100435	0.202455	0.232207	0.161482	0.0603939	0.0401983	0.0301434	0.0100474	0.020103	0.0200819	0.31121	0.171475	0.378014	0.33367	0.584422	0.172484
LOI	0.33	1.2	0.92	0.81	0.52	0.37	0.33	0.38	0.41	0.31	1	0.87	2.22	0.58	5.24	0.83
Total	99.88	99.71	99.65	99.72	99.82	99.83	99.83	99.88	99.87	99.86	100.6	100.02	100.12	99.48	99.35	99.39
Mg#	37.4673	48.0064	48.3104	45.8645	38.4539	36.8437	35.2641	30.9261	29.6027	30.6242	43.7702	41.4537	44.9953	42.8453	42.0845	42.0889
2σ	0.749346	0.960127	0.966208	0.917289	0.769079	0.736873	0.705282	0.618522	0.592055	0.612484	0.875404	0.829073	0.899906	0.856906	0.841689	0.841777
Na2O/K2O	0.868481	1.70886	1.02479	0.891041	0.686848	0.750499	0.752941	0.784483	0.826531	0.817978	1.59023	0.984293	1.45768	1.35331	1.38129	1.16364
2σ	0.0173696	0.0341772	0.0204959	0.0178208	0.013737	0.01501	0.0150588	0.0156897	0.0165306	0.0163596	0.0318046	0.0196859	0.0291536	0.0270662	0.0276259	0.0232727
Na2O+K2O	8.27586	6.4988	7.42052	7.88236	8.13305	8.81348	8.98272	8.31929	8.99608	8.12313	6.91698	7.64575	8.00981	7.54297	7.03432	8.4517
2σ	0.165517	0.129976	0.14841	0.157647	0.162661	0.17627	0.179654	0.166386	0.179922	0.162463	0.13834	0.152915	0.160196	0.150859	0.140686	0.169034
Sc	1.48	9.74	10.7	5.29	1.77	1.69	1.48	0.73	5.82	0.88
V	11		96.1	53.9	18.9	14	11.3	8.19	12.6	12.2	80.29	51.94	105.35
Cr	4.34	29.6	27.4	17.8	6.76	6.51	5.98	6.99	7.22	7.18
Co	6.24	19.7	14	10.5	4.99	1.92	2.26	2.08	4.41	3.39	11.89	7.66	19.1
Ni	12	24.9	12.9	12	6.52	1.32	2.04	2.45	7.29	6.26	6.46	2.48	8.17	10.12	12.32	7.427
Cu	6.19	11.8	22	14.7	5.02	4.7	3.65	3.41	5.64	5.12
Zn	17	75.4	70	53.3	32.3	28.2	28.7	33.9	38.7	44.2	79.24	83.95	106.33
Ga	19.3	17.4	20.3	17.1	15.9	16.9	20.4	18.9	16.3	17.4				20.28	21.77	21.43
Ge
Cs
Rb	169	119	100	97	142	175	196	181	167	191	39.9	76.8	78.6	56.14	81.59	59.6
Ba	53.4	1290	1734	1269	698	366	281	120	174	167	1358.7	1415.4	2136.9	2116	2163.5	2622.7
Th	16.3	7.89	7.13	9.44	17.7	21.4	22	19	110	19.1	7.93	11.86	8.55	5.551	4.436	2.57
U	4.53	1.9	2.09	2.45	2.82	5.08	4.8	3.28	2.8	6.29	1.16	2.46	0.82	0.779	0.445	0.744
Nb	14.13	10.07	8.2	9.09	8.36	13.39	8.47	23.08	20.85	36.56	14.79	10.89	10.51	12.31	12.79	7.162
Ta	0.9	0.79	1.14	0.74	0.89	1.13	0.71	1.68	1.6	3.29	1.24	0.89	0.86	0.74	0.831	0.396
K	36768.9	19916	30423.5	34602.8	40025.2	41796.7	42539.9	38701.7	40886.7	37092.9	22168.4	31986.8	27055.3	26608.4	24522.5	32427.7
La	11.54	39.34	41.4	48.8	27.71	31.93	22.59	23.64	32.65	27.46	52.79	42.55	81.45	46.57	52.85	43.14
Ce	20.55	75.85	72.25	84.99	47.26	45.72	39.73	47.05	59.97	55.79	100.09	68.75	135.82	92.21	104.2	79.12
Pb	30.6	11.5	19.1	17.2	21.3	28.5	33.9	17	20.8	21.5	17.49	22.3	15.76
Pr	2.34	7.99	7.81	8.87	5.02	5.2	3.51	5.5	6.74	6.97	11.9	7.15	14.62	11.33	12.8	9.677
Sr	22.4	444	645	528	185	115	82.8	30.7	49.2	50.8	708.7	736.7	746.8	986	942	1898.1
P	43.8281	883.475	1013.31	704.679	263.548	175.418	131.54	43.8452	87.7257	87.6337	1358.08	748.284	1649.58	1456.08	2550.31	752.687
Nd	5.92	24.47	25.83	24.33	12.85	13.03	9.7	18.39	20.42	21.82	44.44	26.14	53.22	43.22	46.9	36.46
Zr	47.1	152	190	140	88.9	84.7	75.4	111	331	127	202.6	181.9	315.4	268.1	392.3	521.4
Hf	2.61	3.52	4.26	3.75	2.41	2.94	2.48	4.15	8.74	4.26	5.1	4.71	7.6	6.471	7.811	10.24
Sm	1.01	4.5	4.75	4.09	2.18	2.02	1.49	4.66	4.72	5.32	7.13	4.36	8.57	7.697	7.483	5.69
Eu	0.16	1.24	1.58	1.25	0.53	0.42	0.31	0.26	0.36	0.41	1.68	1	2.11	1.643	2.009	1.668
Ti	421.476	3701.83	3994.66	2722.74	1086.18	1024.2	722.837	722.813	662.845	902.931	4814.77	2902.56	5696.1	5031.19	6879.81	2797.99
Gd	0.8	3.43	3.68	3.11	1.47	1.34	1.11	4.42	4.3	4.88	5.15	3.19	5.96	5.629	5.208	3.941
Tb	0.12	0.48	0.51	0.44	0.21	0.19	0.16	0.78	0.74	0.88	0.74	0.42	0.8	0.851	0.779	0.51
Dy	0.77	2.67	2.69	2.24	1.15	1.11	0.94	4.61	4.01	5.15	4.02	2.09	4.29	4.554	3.896	2.443
Y	6.07	14.97	13.77	11.36	6.47	6.53	6.33	20.61	19.02	25.83	23.63	13.86	22.61	25.56	22.6	14.62
Ho	0.18	0.55	0.56	0.46	0.25	0.24	0.21	0.79	0.73	0.95	0.79	0.4	0.79	0.829	0.702	0.45
Er	0.61	1.6	1.52	1.18	0.73	0.73	0.67	2.01	1.9	2.69	2.13	1.06	2.04	2.248	2.105	1.253
Tm	0.11	0.24	0.23	0.18	0.12	0.13	0.12	0.34	0.29	0.45	0.33	0.17	0.29	0.333	0.352	0.173
Yb	0.84	1.62	1.43	1.19	0.83	0.97	0.95	2.1	1.94	2.88	2.16	1.13	1.74	1.937	2.32	1.096
Lu	0.15	0.27	0.22	0.19	0.15	0.17	0.17	0.31	0.28	0.41	0.31	0.18	0.28	0.298	0.343	0.174
Sr/Y	3.69028	29.6593	46.841	46.4789	28.5935	17.611	13.0806	1.48957	2.58675	1.96671	29.9915	53.153	33.0296	38.5759	41.6814	129.829
2σ	0.184514	1.48297	2.34205	2.32394	1.42968	0.880551	0.654028	0.0744784	0.129338	0.0983353	1.49958	2.65765	1.65148	1.92879	2.08407	6.49145
Eu/Eu*d	0.544174	0.964922	1.15534	1.0715	0.905133	0.78045	0.736938	0.175143	0.244299	0.246004	0.84759	0.819757	0.902594	0.763106	0.983853	1.07686
2σ	0.0272087	0.0482461	0.057767	0.053575	0.0452567	0.0390225	0.0368469	0.00875715	0.0122149	0.0123002	0.0423795	0.0409878	0.0451297	0.0381553	0.0491926	0.0538431
(La/Yb)Ne	9.85433	17.4189	20.7666	29.4153	23.9474	23.6117	17.0566	8.07474	12.0721	6.83925	17.5307	27.0098	33.577	17.2456	16.3402	28.2339
2σ	0.492716	0.870943	1.03833	1.47077	1.19737	1.18059	0.852831	0.403737	0.603604	0.341963	0.876534	1.35049	1.67885	0.862278	0.81701	1.41169
(Gd/Lu)N	0.659205	1.57019	2.06751	2.02315	1.21129	0.974266	0.807042	1.76231	1.89816	1.47115	2.05337	2.19048	2.63094	2.33473	1.87672	2.79949
2σ	0.0329603	0.0785095	0.103375	0.101158	0.0605645	0.0487133	0.0403521	0.0881155	0.0949079	0.0735577	0.102669	0.109524	0.131547	0.116737	0.0938358	0.139975
aMajor element data were normalized to 100% withoud LOI; Analytical errors for major and trace elements are around 2% and 5%, respectively.
bMg# =100*MgO/(MgO + 0.9*Fe2O3T);
cA/CNK= molar Al2O3/(CaO+Na2O+K2O)
dEu/Eu* = EuN/(SmN×GdN)1/2.
eSubscript "N" denotes that the element concentrations were normalized by chondrite values of Sun and McDonough (1989) before calculate the ratios.

## Sheet: Table S2
Table S2. LA-ICPMS zircon U-Th-Pb isotopes data for the post-collisional early-stage granitoids from the Dabie orogen.
Spot	Element（ppm）			Th/U	Isotopic ratios									Age（Ma）								Concordance
	Pb	Th	U		207Pb/206Pb	1σ	207Pb/235U	1σ	206Pb/238U	1σ	208Pb/232Th	1σ		207Pb/206Pb	1σ	207Pb/235U	1σ	206Pb/238U	1σ	208Pb/232Th	1σ
Liangshan pluton 15DB007
1	3.9204	41.9009	168.328	0.248923	0.0475338	0.00408667	0.142342	0.012452	0.0208018	0.000551385	0.00726561	0.000502822		76.02	257.37	135.128	11.0684	132.722	3.48276	146.323	10.0898	0.98
2	3.58837	37.949	146.731	0.258629	0.0494621	0.003208	0.145861	0.00950804	0.0217403	0.000557259	0.0072134	0.000482312		168.6	156.46	138.251	8.42589	138.645	3.51669	145.275	9.67879	0.99
3	4.38926	37.2022	177.197	0.209949	0.0467058	0.00375655	0.144456	0.0108108	0.0215302	0.00062911	0.00861443	0.00105939		35.28	181.46	137.005	9.59203	137.32	3.97072	173.371	21.2297	99%
4	3.40404	38.3047	143.938	0.26612	0.0509348	0.00438282	0.141926	0.0107642	0.0211582	0.000567241	0.00667478	0.000487149		238.955	199.975	134.758	9.57179	134.972	3.58164	134.464	9.78109	99%
5	3.158	36.3136	125.189	0.290071	0.0512613	0.00439339	0.154536	0.0127668	0.0219926	0.000717326	0.00761299	0.000585021		253.77	198.123	145.909	11.2285	140.237	4.5253	153.293	11.7352	96%
6	2.88791	29.607	119.736	0.247269	0.0504546	0.00447585	0.146884	0.0111943	0.0218557	0.000678148	0.0075095	0.000503838		216.74	192.57	139.157	9.91119	139.373	4.27878	151.217	10.1078	99%
7	3.46343	40.3059	146.67	0.274806	0.0504509	0.00380613	0.141702	0.00993262	0.0208973	0.000619952	0.00769885	0.000568253		216.74	178.68	134.559	8.83414	133.324	3.91532	155.015	11.3979	99%
8	6.43363	83.7051	257.621	0.324915	0.0506565	0.00273336	0.147268	0.00718991	0.0220967	0.000582018	0.00702271	0.000285882		233.4	125.907	139.496	6.3641	140.894	3.6716	141.449	5.73802	99%
9	3.88799	44.6484	162.475	0.274802	0.0484573	0.00438901	0.142732	0.0124561	0.0210669	0.000575495	0.00737399	0.000469678		120.46	199.97	135.474	11.0684	134.395	3.63406	148.498	9.42375	99%
10	3.6996	38.6921	165.021	0.234468	0.0489443	0.00388216	0.138274	0.0102344	0.0202653	0.000642856	0.00652762	0.000415912		146.38	174.05	131.506	9.1299	129.332	4.0624	131.509	8.35198	98%
11	2.80664	27.4077	119.63	0.229104	0.0493479	0.00341958	0.141895	0.00976315	0.0209913	0.000535954	0.00853519	0.000548022		164.9	155.53	134.73	8.68196	133.918	3.38472	171.783	10.983	99%
13	5.35888	57.1275	200.94	0.284302	0.0527266	0.00399538	0.154483	0.0113784	0.0217793	0.000490638	0.00800781	0.000475856		316.725	139.798	145.862	10.0079	138.891	3.09635	161.211	9.5417	95%
14	3.79653	34.6406	164.467	0.210623	0.0523717	0.00369598	0.149271	0.00946128	0.0216218	0.000483054	0.0066789	0.000396917		301.91	161.09	141.268	8.35961	137.898	3.04897	134.547	7.96935	97%
15	2.32366	23.0017	102.112	0.225258	0.052073	0.00430692	0.142177	0.0101167	0.0210403	0.000518485	0.00660247	0.000468289		287.1	195.345	134.981	8.99413	134.228	3.2743	133.012	9.40308	99%
17	2.7679	27.1842	114.592	0.237226	0.0508621	0.0044109	0.147711	0.0116866	0.0208752	0.000669849	0.00754787	0.000460321		235.25	206.455	139.889	10.3396	133.185	4.23043	151.986	9.23441	95%
18	5.39196	55.2617	209.308	0.264021	0.0484491	0.00411408	0.145035	0.0108795	0.0226754	0.000593644	0.00779586	0.000583366		120.46	188.86	137.518	9.64804	144.542	3.74283	156.961	11.6999	95%
19	4.21207	43.6795	176.069	0.248082	0.0515309	0.00277728	0.146035	0.00749586	0.0210552	0.000507757	0.00745248	0.000425851		264.88	91.655	138.405	6.64198	134.321	3.20654	150.073	8.54373	97%
20	3.64215	36.8816	158.509	0.232678	0.0505217	0.00326291	0.143514	0.00845535	0.0213982	0.000482409	0.0066884	0.000374008		220.44	149.98	136.169	7.5085	136.486	3.04555	134.737	7.5093	99%
21	4.20918	54.4585	173.447	0.313978	0.0493511	0.0029615	0.139547	0.00762784	0.0208221	0.000378267	0.00666822	0.000281185		164.9	140.722	132.64	6.79731	132.849	2.3898	134.332	5.64573	99%
22	3.79385	52.8578	152.603	0.346375	0.0496193	0.00258809	0.140359	0.00711453	0.0208725	0.00037885	0.00737903	0.000305894		176.01	122.205	133.364	6.33547	133.168	2.39337	148.599	6.13752	99%
23	3.4396	39.721	150.336	0.264215	0.0503697	0.00359017	0.138885	0.00899767	0.0205123	0.000475199	0.00615344	0.000494895		213.035	164.792	132.05	8.02245	130.893	3.00259	123.994	9.94175	99%
24	4.58374	57.8544	187.588	0.308412	0.051395	0.00262022	0.148173	0.00722645	0.0213847	0.00039332	0.00674737	0.000277004		257.47	86.1	140.298	6.3914	136.401	2.48351	135.921	5.56134	97%
25	5.25471	70.6744	210.952	0.335026	0.0489261	0.00286679	0.141361	0.00835198	0.0212099	0.000398448	0.00674167	0.000312838		142.68	-62.03	134.255	7.43069	135.298	2.51627	135.807	6.28081	99%
Shangcheng pluton 15DB020
1	176.724	241.542	355.442	0.679553	0.106701	0.00328337	4.79063	0.14878	0.324849	0.00978016	0.0781735	0.00251371		1743.52	56.0175	1783.26	26.1167	1813.37	47.5981	1521.34	47.1239	98%
2	27.8235	194.861	19.2435	10.1261	0.0967867	0.00473282	3.60521	0.175432	0.273226	0.0105227	0.0647415	0.00207378		1564.82	60.1825	1550.68	38.6946	1557.16	53.2838	1267.95	39.367	99%
3	81.3998	135.725	159.191	0.85259	0.106869	0.00367732	4.63938	0.159019	0.313653	0.00893446	0.0726567	0.00226713		1746.6	62.9625	1756.38	28.6566	1758.66	43.8538	1417.66	42.7199	99%
4	16.9068	113.301	226.979	0.499168	0.0525927	0.00320283	0.443279	0.0354915	0.0580084	0.00301263	0.0206897	0.00121374		322.28	138.87	372.562	24.9704	363.502	18.3569	413.917	24.0351	97%
7	81.1732	83.9334	167.701	0.500494	0.124531	0.00414776	5.64715	0.208683	0.329148	0.011052	0.075209	0.00271428		2021.91	58.945	1923.33	31.9041	1834.25	53.6118	1465.69	51.0241	95%
9	342.628	254.806	521.878	0.488249	0.14532	0.00434333	8.69984	0.269419	0.432399	0.0124016	0.106533	0.00336892		2291.66	51.545	2307.06	28.2465	2316.52	55.8267	2046.12	61.5376	99%
10	145.694	141.996	216.48	0.655932	0.151574	0.00488337	9.45962	0.322477	0.451594	0.0135259	0.111463	0.00371283		2364.82	54.165	2383.63	31.3469	2402.34	60.0814	2135.97	67.5187	99%
11	7.26186	29.2593	148.351	0.19723	0.0581754	0.00541085	0.182904	0.01806	0.0258169	0.00164393	0.0876969	0.0798108		600.025	203.678	170.556	15.5028	164.315	10.3311	1699.09	1483.09	96%
12	5.84841	243.836	140.319	1.73773	0.0498666	0.00550871	0.144778	0.0137516	0.0218497	0.00109877	0.00734871	0.000419305		187.12	240.705	137.291	12.1976	139.336	6.9321	147.991	8.41326	98%
13	5.64821	54.1565	238.242	0.227317	0.0476735	0.00338447	0.141172	0.00983048	0.0211566	0.000703681	0.0519727	0.00192495		83.425	159.235	134.087	8.74736	134.961	4.44284	102.413	6.87799	99%
14	4.67131	93.7061	139.238	0.672993	0.0592466	0.00304623	0.798928	0.0439572	0.0994166	0.0039447	0.0304443	0.00134802		575.96	111.095	596.224	24.8144	610.989	23.132	606.165	26.4414	98%
15	300.887	206.821	453.373	0.456183	0.129995	0.00426608	6.67469	0.243592	0.373006	0.0109514	0.0912441	0.00411789		2097.84	57.7175	2069.28	32.2587	2043.53	51.4297	1764.9	76.2724	99%
16	3.7072	40.9973	125.565	0.326502	0.0538287	0.00625938	0.151666	0.0148736	0.0221209	0.000908268	0.00832671	0.000714646		364.87	262.928	143.382	13.1139	141.046	5.72886	167.604	14.3253	98%
17	9.0074	350.864	223.438	1.5703	0.0486748	0.00350116	0.14778	0.0101629	0.0221688	0.000700609	0.00686948	0.000263773		131.57	168.49	139.95	8.99113	141.348	4.41913	138.373	5.29507	99%
18	9.50997	374.118	236.642	1.58094	0.051022	0.00396558	0.151151	0.0109356	0.0218239	0.000740401	0.00662954	0.000289017		242.66	179.605	142.928	9.64632	139.173	4.6716	133.555	5.80321	97%
19	4.83961	88.0025	147.56	0.596386	0.0501925	0.004371	0.150381	0.01114	0.0225125	0.000770076	0.00838936	0.000443187		211.185	183.31	142.249	9.83317	143.515	4.85555	168.86	8.88328	99%
21	103.772	106.062	649.621	0.163267	0.0683224	0.00207377	1.27359	0.0457937	0.134224	0.0043816	0.0469606	0.00148223		879.63	62.9625	833.997	20.4592	811.919	24.9069	927.566	28.6153	97%
22	40.8162	332.797	370.931	0.897193	0.0549866	0.00211535	0.536397	0.0208885	0.0704347	0.00201834	0.022156	0.000716226		413.01	85.1775	436.046	13.8081	438.774	12.1572	442.933	14.1627	99%
24	1283.11	346.774	2065.32	0.167904	0.165856	0.004725	10.3809	0.328195	0.450761	0.013415	0.126786	0.00366144		2516.36	43.5175	2469.35	29.3291	2398.63	59.6233	2412.71	65.6788	97%
26	17.163	120.681	167.819	0.719117	0.0557801	0.00257727	0.529893	0.0244294	0.0695291	0.00221779	0.0206022	0.000747058		442.64	99.065	431.739	16.2163	433.318	13.3694	412.184	14.7949	99%
29	6.0455	220.068	156.902	1.40258	0.0486226	0.00402802	0.145733	0.0119878	0.0215919	0.000741875	0.00710601	0.000281994		127.865	194.415	138.137	10.6244	137.709	4.68194	143.12	5.65951	99%
30	6.74249	258.063	155.978	1.65448	0.0514012	0.00447432	0.16261	0.0129159	0.0232332	0.000877958	0.00693567	0.00029736		257.47	199.975	152.986	11.2808	148.057	5.53175	139.701	5.96892	96%
31	9.42047	458.159	230.745	1.98557	0.0502922	0.00394837	0.138054	0.00925299	0.0205579	0.000697505	0.00647243	0.000246116		209.33	186.088	131.309	8.2561	131.181	4.4064	130.401	4.94256	99%
32	5.24455	186.634	153.504	1.21582	0.0493732	0.00515773	0.138847	0.0142011	0.020504	0.000843624	0.00655756	0.000333083		164.9	229.595	132.016	12.6619	130.841	5.32955	132.11	6.68848	99%
33	7.47402	314.816	193.566	1.6264	0.052621	0.00431414	0.144195	0.010653	0.020553	0.000736153	0.00675568	0.000259426		322.28	188.865	136.773	9.45414	131.15	4.65052	136.088	5.20839	95%
34	9.87977	208.268	317.389	0.656192	0.0512576	0.00325695	0.148797	0.00918098	0.0214328	0.000687148	0.00738226	0.000339183		253.77	146.275	140.849	8.11532	136.705	4.33732	148.664	6.8054	97%
35	7.47155	257.767	191.811	1.34386	0.0485685	0.00451179	0.145637	0.0123104	0.0223801	0.000838401	0.00658544	0.000292268		127.865	203.675	138.052	10.9111	142.681	5.28693	132.67	5.86874	96%
36	6.89183	283.895	182.101	1.559	0.0507121	0.00415541	0.144238	0.0117291	0.0211224	0.000802461	0.0066956	0.000271291		227.845	186.088	136.812	10.4087	134.745	5.06651	134.882	5.44692	98%
37	5.45313	177.415	169.579	1.04621	0.0496014	0.0040277	0.138246	0.00979748	0.0204374	0.000769866	0.00674566	0.000299223		176.01	177.75	131.48	8.74039	130.419	4.86399	135.887	6.00743	99%
42	77.2822	473.013	503.075	0.940244	0.0630186	0.00214205	0.841536	0.0303727	0.0970139	0.00299903	0.035295	0.00117784		709.27	76.845	619.993	16.7522	596.885	17.6262	701.089	22.9951	96%
44	51.5106	128.628	212.734	0.60464	0.0738515	0.00242032	1.78148	0.0621041	0.174566	0.00527483	0.05412	0.00163834		1038.89	65.895	1038.72	22.6822	1037.22	28.9554	1065.31	31.4144	99%
45	64.7914	142.725	317.372	0.44971	0.0698284	0.00255002	1.48378	0.0566234	0.153757	0.0047481	0.0496618	0.00164805		924.07	71.3	923.776	23.1565	921.989	26.5338	979.646	31.7347	99%
46	134.015	252.569	559.761	0.451209	0.0739477	0.00237078	1.81907	0.0595997	0.178078	0.00549817	0.0536913	0.0016565		1039.82	64.81	1052.35	21.4788	1056.47	30.0913	1057.09	31.7755	99%
47	4.95223	191.823	129.742	1.47849	0.0502145	0.00395673	0.141436	0.0103988	0.0208405	0.000715943	0.00685611	0.000294255		205.63	189.79	134.322	9.25091	132.966	4.52162	138.104	5.90705	98%
48	102.929	25.2376	652.728	0.0386647	0.0658738	0.00212134	1.2051	0.0484165	0.131782	0.00467406	0.0438892	0.00239997		1200	66.6625	802.938	22.301	798.022	26.6261	868.183	46.4692	99%
49	6.7522	267.235	175.924	1.51904	0.0499082	0.00477858	0.140545	0.0121449	0.0210527	0.00074612	0.00674413	0.000299894		190.82	207.38	133.529	10.8125	134.306	4.71119	135.856	6.02091	99%
Sanjiaoshan pluton 15DB052
1	17.5509	276.107	726.561	0.38002	0.0462624	0.0020858	0.131408	0.00580944	0.0205834	0.000580196	0.00609365	0.000265404		13.06	103.695	125.362	5.21439	131.342	3.66544	122.793	5.33191	95%
2	40.1891	684.472	1582.25	0.432594	0.0479407	0.00163473	0.141155	0.00526909	0.0212105	0.000599998	0.00593785	0.000198998		94.535	81.475	134.072	4.68925	135.302	3.78821	119.662	3.99845	99%
3	21.6468	530.996	761.846	0.696986	0.0491503	0.0025294	0.140897	0.0072723	0.020903	0.000644121	0.00604727	0.000320508		153.79	120.353	133.843	6.47289	133.361	4.06789	121.861	6.43924	99%
4	7.86246	49.0055	359.283	0.136398	0.0483394	0.00231	0.142265	0.00709064	0.0213803	0.00067805	0.00561898	0.000429312		122.31	111.09	135.059	6.30368	136.374	4.28013	113.254	8.62886	99%
5	34.2716	532.094	1352.9	0.3933	0.0509153	0.00456266	0.147206	0.01385	0.0214392	0.0010876	0.00566809	0.000235247		235.25	207.382	139.442	12.2589	136.745	6.86437	114.241	4.72807	98%
6	7.22294	117.912	289.424	0.407403	0.0501321	0.00386575	0.136687	0.00980387	0.0202294	0.000651549	0.00588311	0.000335879		211.185	179.607	130.088	8.75807	129.106	4.11746	118.562	6.74916	99%
8	83.1622	411.951	696.839	0.591172	0.0582791	0.00192436	0.699151	0.0273228	0.0875263	0.00315571	0.0294387	0.000968208		538.925	72.21	538.284	16.3318	540.891	18.7081	586.431	19.01	99%
10	6.62368	116.638	258.157	0.451809	0.049222	0.00333577	0.140853	0.00956055	0.0209323	0.000690499	0.00628703	0.000361972		166.75	142.57	133.803	8.50958	133.546	4.36057	126.677	7.27055	99%
11	12.625	60.2531	111.378	0.540979	0.0600827	0.0031673	0.725324	0.0503182	0.0865176	0.00468193	0.0309226	0.00135273		605.575	114.797	553.805	29.6155	534.909	27.7798	615.545	26.5216	96%
12	5.8274	68.2472	250.198	0.272772	0.0485805	0.00301366	0.138209	0.00858273	0.0209095	0.000661597	0.00636879	0.000371186		127.865	205.525	131.447	7.65708	133.401	4.1782	128.319	7.45502	98%
13	22.073	174.536	995.228	0.175372	0.0467508	0.00193232	0.140918	0.00546996	0.0213515	0.000659236	0.00634151	0.000284618		35.28	96.29	133.861	4.86895	136.192	4.16152	127.771	5.71652	98%
14	25.5755	394.729	1072.85	0.367927	0.0480835	0.0017807	0.140352	0.0057368	0.0212435	0.000771113	0.00688932	0.000345277		101.94	87.03	133.357	5.10892	135.51	4.86806	138.771	6.93108	98%
15	6.43507	67.7429	289.925	0.233657	0.0490852	0.0034237	0.13723	0.00951589	0.0203797	0.00071724	0.00623895	0.000376728		150.085	159.235	130.574	8.49679	130.055	4.53182	125.711	7.56729	99%
16	32.4385	401.498	1500.17	0.267635	0.0478329	0.0017807	0.135183	0.00548163	0.0204408	0.000694296	0.00487657	0.000227628		100.09	-112.02	128.745	4.90391	130.441	4.38663	98.3268	4.57854	98%
17	8.64584	114.084	356.561	0.319957	0.0488965	0.00284556	0.14158	0.00820851	0.0208805	0.000663812	0.00588761	0.000315622		142.68	-63.8825	134.45	7.30166	133.219	4.1923	118.653	6.34208	99%
19	12.9729	110.603	596.194	0.185515	0.0508832	0.00267846	0.144078	0.00727645	0.0206165	0.000645294	0.00712007	0.000392662		235.25	122.205	136.669	6.45861	131.551	4.07642	143.403	7.88046	96%
20	16.8179	166.865	481.672	0.346428	0.0511431	0.00243352	0.224885	0.0116366	0.0319009	0.001216	0.0111631	0.000676433		255.62	76.8425	205.967	9.64734	202.435	7.59729	224.381	13.5213	98%
21	12.2762	80.7907	580.288	0.139225	0.0516016	0.00263112	0.150071	0.00738793	0.0212707	0.000709096	0.00680968	0.000423004		333.39	121.28	141.974	6.52343	135.682	4.47652	137.172	8.49202	95%
22	19.4348	137.953	958.841	0.143875	0.0486711	0.00200579	0.139844	0.006506	0.0206324	0.00071926	0.00653004	0.000362217		131.57	100.91	132.905	5.79631	131.651	4.54347	131.558	7.27371	99%
23	31.6654	393.777	1381.28	0.285081	0.0494409	0.00193696	0.145067	0.00587782	0.0214143	0.0007648	0.00640082	0.000225686		168.6	90.725	137.547	5.21297	136.588	4.82742	128.963	4.53261	99%
25	16.1699	280.652	689.058	0.407298	0.04879	0.00226002	0.13761	0.00656444	0.0203789	0.000677398	0.006358	0.000231955		200.075	104.615	130.913	5.85982	130.05	4.28015	128.102	4.6587	99%
Tiantangzhai pluton 15DB064
1	43.3488	373.298	1779.89	0.209731	0.0482982	0.00210322	0.149993	0.00638872	0.022361	0.000643994	0.00665437	0.000255985		122.31	101.838	141.906	5.64173	142.56	4.06138	134.054	5.13983	99%
2	8.57156	74.9375	336.496	0.222699	0.0498916	0.00283128	0.15675	0.00837353	0.0230881	0.000727204	0.00702791	0.000404512		190.82	131.463	147.854	7.35089	147.143	4.58276	141.553	8.11903	99%
3	18.8151	388.513	727.75	0.533855	0.0493834	0.00256749	0.143937	0.00652358	0.0213988	0.000646573	0.00685042	0.000242712		164.9	122.205	136.544	5.79122	136.49	4.08142	137.99	4.87237	99%
5	7.68922	192.981	282.398	0.683367	0.0496674	0.00413546	0.147091	0.011095	0.0217572	0.000724434	0.00690356	0.000353339		188.97	172.195	139.34	9.82153	138.752	4.57117	139.057	7.09279	99%
7	5.80324	70.6105	227.439	0.310459	0.0511298	0.00408396	0.156729	0.0112741	0.0229589	0.000763357	0.00556685	0.000576187		255.62	185.162	147.836	9.89694	146.329	4.81112	112.206	11.5816	98%
8	14.5666	478.532	508.948	0.940236	0.0491376	0.00277114	0.145476	0.00801991	0.0214924	0.000649491	0.00663793	0.000252838		153.79	131.463	137.91	7.1097	137.081	4.09946	133.724	5.07672	99%
10	23.1561	74.7353	1028.25	0.0726824	0.0488839	0.00205953	0.146142	0.00610696	0.0217213	0.000647004	0.00682041	0.000479608		142.68	99.985	138.499	5.41106	138.525	4.08287	137.388	9.62827	99%
11	13.2477	44.304	627.142	0.0706444	0.0468671	0.00279693	0.14095	0.00824838	0.0220515	0.000709267	0.006586	0.000499221		42.69	146.28	133.89	7.34117	140.608	4.47422	132.681	10.0243	95%
12	185.769	2739.3	7371.11	0.371627	0.0476879	0.00160362	0.148924	0.00459209	0.0225475	0.00061754	0.00703606	0.000212787		83.425	-119.427	140.961	4.05948	143.736	3.89391	141.716	4.27086	98%
13	4.57693	53.401	186.939	0.28566	0.0529948	0.00382508	0.156495	0.0102569	0.0220557	0.000721918	0.0066592	0.000391417		327.835	158.312	147.63	9.00592	140.635	4.55399	134.151	7.85908	95%
14	49.941	235.644	2132.23	0.110515	0.0485988	0.00167531	0.15085	0.00511096	0.0224493	0.000619014	0.00704483	0.000288598		127.865	76.84	142.662	4.51039	143.117	3.90357	141.892	5.7924	99%
15	13.0746	211.371	508.49	0.415685	0.0493626	0.0033411	0.149175	0.00932455	0.0221266	0.000652071	0.00698415	0.000325521		164.9	151.825	141.183	8.23951	141.082	4.11323	140.675	6.53387	99%
16	20.1482	319.724	787.719	0.405886	0.049232	0.00193931	0.153637	0.00577126	0.0227748	0.000652086	0.00714606	0.000268123		166.75	95.355	145.118	5.08058	145.169	4.11076	143.924	5.38091	99%
17	4.98586	63.2057	184.771	0.342076	0.0504146	0.00415288	0.162107	0.0121216	0.0238847	0.000806984	0.0073824	0.000508442		213.035	190.718	152.545	10.5917	152.16	5.08147	148.667	10.2014	99%
18	17.5146	168.306	766.388	0.219609	0.050452	0.00236322	0.145631	0.00673365	0.020899	0.000605724	0.00700481	0.00027701		216.74	109.245	138.047	5.96883	133.335	3.82549	141.089	5.56004	96%
20	3.97864	77.2452	159.668	0.483785	0.0517981	0.00407211	0.149509	0.00999639	0.0216941	0.000748244	0.00646791	0.00043427		275.99	184.235	141.479	8.83052	138.354	4.72166	130.31	8.72116	97%
21	110.073	1054.15	4925.42	0.214023	0.0487718	0.00162916	0.141764	0.00511036	0.0209089	0.000604909	0.00565735	0.000188865		200.075	77.7675	134.614	4.54562	133.398	3.82031	114.025	3.79591	99%
22	5.75603	53.6128	243.413	0.220255	0.0508262	0.00401009	0.149761	0.0111099	0.0216348	0.000700758	0.00740476	0.000503376		231.55	183.31	141.701	9.81193	137.98	4.42234	149.115	10.0996	97%
23	9.5578	158.016	401.737	0.393332	0.0513618	0.00242553	0.151564	0.00698877	0.0215458	0.000619607	0.00572205	0.000250514		257.47	107.392	143.292	6.16307	137.418	3.9107	115.326	5.03465	95%
25	73.6232	536.506	3037.39	0.176634	0.0482863	0.00163506	0.150587	0.00501281	0.0225468	0.000618667	0.00694661	0.00023851		122.31	79.62	142.43	4.42482	143.732	3.90102	139.921	4.78757	99%
28	11.2561	234.281	437.213	0.53585	0.0514723	0.00287023	0.150872	0.00827909	0.0213399	0.000609675	0.00742358	0.000294378		261.175	129.613	142.681	7.30506	136.119	3.8488	149.493	5.9062	95%
29	37.116	447.283	1535.41	0.291312	0.0489513	0.00200415	0.155542	0.00667539	0.0229641	0.000663742	0.00740096	0.00027066		146.38	91.6525	146.793	5.86657	146.362	4.18345	149.039	5.43045	99%
30	34.2123	254.283	1465.49	0.173514	0.0490057	0.00185823	0.14621	0.0055072	0.0215811	0.000595606	0.00738782	0.000304243		146.38	88.875	138.56	4.87953	137.641	3.75915	148.775	6.10433	99%
Egongbao pluton 15DB068
1	9.46563	281.767	265.579	1.06095	0.0507692	0.0029405	0.148526	0.0086257	0.0218541	0.00103807	0.00672014	0.000278742		231.55	133.315	140.61	7.62636	139.363	6.54914	135.375	5.59639	99%
2	2.19734	47.342	52.3181	0.904888	0.0538959	0.00549376	0.162186	0.0140839	0.0239038	0.00111513	0.00766882	0.000460346		364.87	234.227	152.615	12.3053	152.281	7.02125	154.413	9.23381	99%
3	2.40505	62.6903	69.474	0.902357	0.0566828	0.0063134	0.159255	0.0154163	0.0228647	0.00135076	0.00742652	0.000427322		479.67	248.118	150.051	13.5034	145.736	8.51325	149.552	8.57346	97%
4	11.8715	394.357	286.262	1.37761	0.0467067	0.00287507	0.144611	0.0111465	0.0218879	0.00100315	0.00754335	0.000279393		35.28	140.73	137.143	9.88851	139.576	6.32865	151.896	5.60487	98%
5	10.3703	339.651	223.521	1.51955	0.0480749	0.00364338	0.142463	0.011003	0.0210153	0.000874274	0.00818819	0.000434299		101.94	170.345	135.235	9.77954	134.069	5.5204	164.828	8.70686	99%
6	11.671	317.444	349.266	0.908888	0.0497841	0.00360707	0.142297	0.00941579	0.0211023	0.000842771	0.00743749	0.000303035		183.415	170.347	135.088	8.37016	134.619	5.32107	149.772	6.07979	99%
7	7.86277	194.678	241.477	0.806196	0.0471355	0.00327849	0.138286	0.0099081	0.0213873	0.000867671	0.0072809	0.000312049		57.5	155.535	131.516	8.83876	136.418	5.47674	146.63	6.26162	96%
9	7.04503	175.415	207.82	0.844069	0.0489295	0.00359835	0.145964	0.0115004	0.0217008	0.000797511	0.00701478	0.000294478		142.68	166.64	138.342	10.1904	138.396	5.03244	141.289	5.91061	99%
11	4.18689	83.3658	134.245	0.620996	0.0532004	0.00507785	0.146226	0.0116307	0.0214169	0.000803837	0.0072744	0.000407293		344.5	216.64	138.574	10.3034	136.604	5.07375	146.5	8.17286	98%
12	1.76562	11.6371	73.0992	0.159196	0.0534538	0.00700002	0.150617	0.0143651	0.0230694	0.000968349	0.0126972	0.0015374		346.35	299.96	142.457	12.6771	147.025	6.10213	255.024	30.6847	96%
15	22.8806	103.176	156.349	0.65991	0.0580343	0.00315092	0.826037	0.0449265	0.0994066	0.00355908	0.0349243	0.00148382		531.52	123.13	611.411	24.9852	610.93	20.8714	693.851	28.9793	99%
16	11.594	304.674	304.696	0.999928	0.050041	0.00323971	0.157033	0.009902	0.0230333	0.000830559	0.00725471	0.000355477		198.23	149.98	148.103	8.69033	146.798	5.23418	146.104	7.13324	99%
18	6.9915	212.637	179.819	1.18251	0.0485387	0.00459958	0.144841	0.0132174	0.0216709	0.000820525	0.00669877	0.000315515		124.16	220.34	137.346	11.7232	138.207	5.17778	134.946	6.33484	99%
20	2.7645	84.1665	66.9257	1.25761	0.0515771	0.00628867	0.147339	0.0161522	0.0218418	0.000878547	0.00710327	0.000394689		264.88	259.23	139.56	14.2948	139.286	5.54293	143.065	7.92128	99%
21	11.3528	315.54	320.904	0.983285	0.0518922	0.00369986	0.153133	0.00962333	0.0217991	0.000782822	0.00671998	0.000267495		279.69	162.94	144.674	8.47432	139.016	4.93931	135.371	5.37058	96%
23	7.69797	194.54	234.319	0.830237	0.0514967	0.00342133	0.143973	0.00851261	0.0206326	0.000721339	0.00681727	0.00027433		264.88	153.685	136.576	7.55631	131.653	4.5566	137.325	5.50727	96%
24	4.9226	133.446	121.672	1.09677	0.0508692	0.00522002	0.151476	0.0137804	0.0220943	0.000978506	0.00671737	0.000343857		235.25	222.2	143.215	12.1521	140.878	6.17197	135.319	6.90375	98%
Fuziling pluton 15DB105
1	72.827	110.762	133.395	0.830336	0.122689	0.00380884	6.10734	0.196326	0.360997	0.0109107	0.104863	0.00326085		1995.99	55.2425	1991.3	28.0806	1986.9	51.6902	2015.58	59.6536	99%
2	65.2773	164.007	551.829	0.297207	0.0616393	0.00216642	0.858017	0.0339317	0.100672	0.00346305	0.0375003	0.00207502		661.125	80.545	629.04	18.5482	618.348	20.2851	744.099	40.4248	98%
3	4.0571	86.4871	140.116	0.617255	0.0503863	0.00468527	0.148936	0.0131035	0.0215315	0.000890814	0.00710721	0.000424512		213.035	203.68	140.972	11.5807	137.328	5.62201	143.144	8.51979	97%
4	58.3605	392.796	710.497	0.552846	0.0545997	0.00211584	0.40076	0.0152338	0.0529015	0.00155768	0.0284444	0.000944032		394.495	87.0275	342.199	11.0451	332.31	9.5386	566.899	18.5533	97%
5	11.7394	314.999	385.299	0.817546	0.0513015	0.00334299	0.143667	0.00958765	0.0203441	0.000720793	0.00673779	0.000293467		253.77	149.98	136.304	8.51272	129.83	4.55443	135.729	5.89193	95%
6	127.215	429.431	1807.2	0.237622	0.0555532	0.00189884	0.439467	0.0162474	0.0570904	0.00178048	0.0355909	0.00122408		435.23	71.29	369.876	11.4635	357.906	10.8595	706.865	23.891	96%
7	2.4819	40.6612	69.4911	0.585128	0.0596849	0.0092527	0.153196	0.018363	0.0217346	0.00110524	0.00778773	0.000695895		590.77	340.705	144.73	16.1688	138.609	6.97369	156.798	13.9569	95%
8	24.0549	46.8611	1206.27	0.038848	0.0477318	0.0018562	0.141778	0.00551222	0.0217426	0.000678288	0.0068896	0.000420088		87.13	88.88	134.626	4.90287	138.66	4.28013	138.777	8.43282	97%
9	8.46478	188.92	296.026	0.638188	0.0493087	0.00323462	0.143574	0.00830242	0.0215408	0.000658547	0.00668471	0.000288679		161.195	-45.365	136.222	7.37233	137.386	4.15641	134.663	5.7961	99%
10	18.6769	656.089	481.916	1.36142	0.0491997	0.00230882	0.14134	0.00640638	0.021007	0.000635408	0.00636819	0.000207624		166.75	111.095	134.237	5.70011	134.017	4.01248	128.307	4.16998	99%
11	26.3875	194.33	1172.39	0.165756	0.0469812	0.00170696	0.142753	0.00501639	0.0220496	0.000628119	0.00691738	0.000269188		55.65	75.92	135.493	4.45822	140.596	3.96249	139.334	5.40352	96%
12	18.1208	67.9395	838.3	0.0810444	0.0491793	0.00197037	0.145811	0.00578155	0.0215421	0.000637715	0.00673098	0.000335178		166.75	97.2075	138.206	5.12429	137.395	4.02496	135.592	6.7294	99%
13	168.111	306.951	1363.59	0.225105	0.0645882	0.00194924	0.992598	0.0306716	0.111271	0.00362835	0.0360841	0.00109061		761.115	69.4375	700.045	15.6368	680.126	21.0511	716.49	21.2759	97%
14	61.209	224.296	368.02	0.609467	0.0658863	0.00213128	1.11116	0.0370243	0.121012	0.00361062	0.037262	0.00114151		1200	66.6625	758.734	17.8147	736.388	20.7668	739.456	22.2436	97%
15	15.3745	77.187	726.857	0.106193	0.0500467	0.00223705	0.143558	0.00631543	0.0207324	0.000659031	0.00678148	0.000378346		198.23	99.06	136.208	5.60833	132.283	4.16271	136.606	7.5957	97%
16	18.4937	26.3334	909.761	0.0289454	0.0484694	0.00196597	0.140422	0.00593566	0.0207692	0.00066942	0.0108794	0.00097979		120.46	91.655	133.42	5.28564	132.515	4.22816	218.708	19.5906	99%
17	23.2228	182.795	1046.3	0.174706	0.0478387	0.00194798	0.140138	0.00547984	0.0210146	0.000627081	0.00652514	0.000301576		100.09	83.325	133.167	4.88107	134.065	3.95988	131.459	6.05601	99%
18	20.4929	69.5674	1007.59	0.0690434	0.0474143	0.00207366	0.138242	0.00694834	0.0208273	0.000671145	0.00619003	0.000352688		77.87	94.435	131.477	6.199	132.882	4.23882	124.729	7.08476	98%
19	161.514	209.324	2579.76	0.0811408	0.0568344	0.00171244	0.475355	0.0148073	0.0600582	0.00169082	0.0316081	0.00101884		483.375	66.66	394.881	10.1944	375.979	10.2842	628.982	19.962	95%
20	9.99047	236.524	390.377	0.605885	0.050348	0.00327668	0.127293	0.00782578	0.0184296	0.000550866	0.00616628	0.00029602		209.33	149.98	121.663	7.04937	117.723	3.48743	124.251	5.94656	96%
21	14.1583	645.525	263.206	2.45254	0.051611	0.00263999	0.141617	0.0071657	0.0201387	0.000612778	0.00692964	0.00023864		333.39	121.28	134.483	6.37401	128.533	3.87286	139.58	4.79024	95%
22	44.816	1089.67	1622.4	0.671643	0.0502659	0.00184081	0.139845	0.00509301	0.0202473	0.000555822	0.00611502	0.000193549		205.63	89.8	132.906	4.5378	129.219	3.51265	123.222	3.88828	97%
24	15.4197	191.864	677.114	0.283355	0.0504574	0.00209256	0.140145	0.00594447	0.0202576	0.000572697	0.00667326	0.000311569		216.74	96.2825	133.173	5.29476	129.284	3.61921	134.433	6.25575	97%
25	42.9495	95.535	818.846	0.11667	0.0532572	0.00227675	0.351351	0.0156931	0.0478213	0.00157868	0.0328125	0.00122073		338.945	98.1375	305.737	11.7934	301.132	9.71372	652.565	23.8898	98%
Fenliupu pluton 15DB113
2	20.1594	484.264	696.768	0.695014	0.048436	0.00248342	0.143754	0.0074207	0.0215565	0.000645965	0.00590645	0.00060154		120.46	118.495	136.382	6.58848	137.486	4.07696	119.031	12.0871	99%
5	8.59134	48.0166	392.309	0.122395	0.0486579	0.00269431	0.144171	0.00798102	0.021447	0.000660632	0.00630447	0.00124859		131.57	125.9	136.752	7.08329	136.795	4.16994	127.027	25.0786	99%
6	64.5882	430.03	241.249	1.78251	0.0637552	0.00229331	1.16351	0.0447264	0.131352	0.00390727	0.0311363	0.00587819		744.45	77	783.605	20.9978	795.575	22.2676	619.735	115.224	98%
7	14.0717	66.6971	658.547	0.101279	0.0495305	0.00231022	0.145106	0.00651723	0.0212836	0.000633492	0.00529984	0.000849167		172.305	109.243	137.582	5.77969	135.763	3.99932	106.839	17.0731	98%
8	7.48985	36.3057	45.6129	0.795954	0.0643142	0.00392919	0.971291	0.0526279	0.112691	0.00400468	0.0310944	0.00381322		753.71	129.62	689.129	27.1119	688.358	23.2043	618.914	74.7493	99%
9	15.9919	513.477	490.165	1.04756	0.0471544	0.00286744	0.136576	0.00818446	0.0211154	0.000656235	0.00556382	0.000506384		57.5	137.025	129.989	7.31229	134.702	4.14352	112.146	10.1785	96%
10	49.573	223.98	273.754	0.818179	0.0606668	0.00265441	1.07864	0.0434311	0.124154	0.00389579	0.0350388	0.00220351		627.795	94.43	742.97	21.2214	754.428	22.3439	696.088	43.0302	98%
11	16.285	25.1406	567.335	0.0443135	0.050204	0.00238848	0.233901	0.0156095	0.0332183	0.00176635	0.0329447	0.00150184		211.185	111.095	213.414	12.8459	210.659	11.0212	655.153	29.3874	98%
12	30.1412	165.342	266.75	0.619838	0.0610353	0.00278244	0.792869	0.0402717	0.0943495	0.00330267	0.0314862	0.00120583		638.905	102.763	592.798	22.8113	581.21	19.4573	626.592	23.6286	98%
13	73.7703	49.8029	169.886	0.293155	0.131203	0.00455222	6.37369	0.249127	0.350394	0.0119212	0.107649	0.00427868		2113.89	60.035	2028.65	34.3334	1936.48	56.9181	2066.5	78.0768	95%
14	19.76	47.5518	602.831	0.0788809	0.049697	0.00254313	0.233126	0.0163007	0.0338731	0.00162221	0.0285168	0.00142713		188.97	118.502	212.776	13.4231	214.743	10.1155	568.324	28.0458	99%
15	7.14423	153.187	257.38	0.59518	0.0498896	0.0039737	0.158657	0.0150925	0.0228674	0.00101281	0.00872231	0.000750466		190.82	174.05	149.527	13.2266	145.753	6.38353	175.533	15.0374	97%
16	103.768	626.652	490.314	1.27806	0.06163	0.00230376	1.05608	0.0438827	0.123814	0.00453313	0.0355426	0.00127973		661.125	74.99	731.891	21.6769	752.477	26.0061	705.923	24.9784	97%
17	43.5452	239.968	376.86	0.636757	0.0604495	0.00247818	0.67789	0.030961	0.0811496	0.00311737	0.0301657	0.00111286		620.39	88.875	525.498	18.7396	502.981	18.5895	600.7	21.8346	95%
19	88.031	98.2403	434.396	0.226154	0.072924	0.00284642	1.87818	0.0924337	0.182215	0.00704524	0.0550544	0.00245263		1012.96	84.26	1073.42	32.6175	1079.06	38.4209	1083.22	46.9863	99%
20	25.9157	102.696	156.443	0.656444	0.0634572	0.00280422	1.07301	0.0496327	0.12209	0.0044185	0.0384125	0.0015808		724.08	93.3525	740.217	24.3158	742.583	25.3875	761.862	30.7695	99%
21	64.287	286.327	330.731	0.865741	0.0639335	0.00240966	1.18246	0.0480189	0.134142	0.00515247	0.0395439	0.00136498		738.895	79.6225	792.457	22.3472	811.454	29.2897	783.872	26.5399	97%
22	50.6035	279.523	216.999	1.28813	0.0624971	0.00233258	1.20622	0.0469142	0.139294	0.00463523	0.0406651	0.00132474		700.01	79.62	803.454	21.5985	840.67	26.2312	805.661	25.7297	95%
23	125.228	104.4	207.879	0.502218	0.156671	0.00520457	9.71163	0.380172	0.447747	0.0170779	0.124208	0.00417295		2420.06	56.475	2407.81	36.0746	2385.23	76.0541	2366.43	75.0259	99%
24	33.6068	16.1023	1671.52	0.00963329	0.0481371	0.00188324	0.145086	0.00601477	0.0217171	0.000732154	0.010068	0.0012187		105.645	92.5825	137.564	5.3343	138.499	4.62005	202.479	24.3872	99%
25	29.9175	91.662	164.621	0.556806	0.0659577	0.00310473	1.28942	0.0733961	0.139415	0.00526596	0.0463474	0.00203063		805.555	99.995	841.04	32.557	841.355	29.7964	915.724	39.2255	99%
Datong pluton 15DB136
1	5.56284	52.654	245.299	0.214652	0.0514944	0.00396399	0.148737	0.0103502	0.021572	0.000843605	0.00722957	0.000531574		261.175	177.755	140.796	9.14913	137.583	5.32391	145.6	10.6672	97%
2	4.18051	7.84341	207.259	0.0378435	0.049861	0.0034302	0.144901	0.00941037	0.0216081	0.000736808	0.00998633	0.00096188		187.12	161.09	137.4	8.34634	137.811	4.64991	200.845	19.2495	99%
4	68.9448	255.672	481.957	0.530488	0.0619407	0.00198906	0.996804	0.0340668	0.11535	0.00369978	0.0299755	0.000981788		672.235	63.8825	702.186	17.3297	703.741	21.3871	596.968	19.2666	99%
6	3.91449	3.84089	185.024	0.0207588	0.0484713	0.00383465	0.146693	0.0104213	0.0213287	0.000799625	0.0201952	0.00273983		124.16	174.05	138.988	9.22846	136.048	5.0476	404.123	54.2819	97%
7	6.87447	73.1485	294.723	0.248194	0.0502289	0.00383969	0.145294	0.0110222	0.0210141	0.000765391	0.00813466	0.000670518		205.63	177.755	137.749	9.7724	134.062	4.83302	163.755	13.4433	97%
8	175.876	126.099	297.027	0.424537	0.150596	0.0045237	9.2374	0.281661	0.439448	0.0129528	0.119549	0.00355597		2353.71	50.77	2361.83	27.9823	2348.17	58.0217	2282.49	64.1991	99%
9	158.824	108.066	285.178	0.378942	0.150698	0.00445225	8.92087	0.27652	0.425488	0.0124551	0.116973	0.00347727		2354.02	50.3075	2329.94	28.3456	2285.35	56.3387	2235.92	62.923	98%
10	11.7489	208.403	433.855	0.480352	0.0492956	0.00227266	0.146916	0.00693233	0.0216236	0.000695684	0.00714481	0.000289563		161.195	107.392	139.186	6.13803	137.909	4.39038	143.899	5.8112	99%
11	8.93231	36.494	436.298	0.0836447	0.0485063	0.00265874	0.139472	0.00764337	0.0208829	0.000683198	0.00811494	0.000625383		124.16	131.46	132.573	6.81161	133.234	4.31469	163.359	12.5386	99%
13	8.2707	211.022	286.402	0.736803	0.0488008	0.00378646	0.140679	0.0106511	0.0210113	0.000769377	0.00629359	0.000269776		138.975	170.345	133.649	9.48162	134.044	4.8582	126.809	5.41867	99%
14	6.16923	114.538	228.858	0.500474	0.0489877	0.00279272	0.140945	0.0079231	0.0211698	0.000853153	0.00703852	0.000432754		146.38	133.315	133.885	7.05175	135.045	5.38626	141.766	8.68579	99%
15	316.588	234.697	555.705	0.422341	0.157467	0.00521667	9.39742	0.353514	0.431843	0.0171814	0.116079	0.00369893		2428.7	55.7075	2377.58	34.561	2314.02	77.3638	2219.74	66.9878	97%
16	588.118	17.3818	1064.86	0.0163231	0.184864	0.00574748	12.4515	0.425178	0.4835	0.0163391	0.128808	0.00489272		2698.15	45.8325	2639.07	32.1446	2542.49	71.0134	2448.95	87.6082	96%
17	24.9733	125.777	147.163	0.854676	0.0635646	0.0026066	0.972368	0.0430277	0.109662	0.00368874	0.0351792	0.00116619		727.785	87.0275	689.683	22.1558	670.787	21.4323	698.829	22.7702	97%
19	68.6626	254.814	942.071	0.270483	0.0609377	0.0023264	0.541704	0.0233345	0.0652251	0.00285634	0.0252651	0.00102594		636.74	81.4675	439.547	15.3713	407.324	17.2871	504.319	20.2255	0.95
20	16.5125	156.972	737.809	0.212754	0.0499874	0.00219191	0.146872	0.00705169	0.0209577	0.000725982	0.00712094	0.000327544		194.525	99.985	139.146	6.24393	133.706	4.58448	143.42	6.57359	96%
22	598.008	233.608	1284.79	0.181826	0.141237	0.00444601	7.83494	0.277086	0.400663	0.0142366	0.104899	0.00340562		2242.28	54.63	2212.23	31.8805	2172.09	65.5329	2016.24	62.3	98%
Datong pluton 15DB138
1	121.666	194.011	288.08	0.673461	0.121383	0.00378748	5.51336	0.186514	0.324515	0.00996336	0.0959884	0.002968		1976.86	55.4	1902.68	29.1049	1811.74	48.5015	1852.58	54.736	95%
2	2.82583	35.7704	123.263	0.290196	0.0476878	0.00412211	0.139164	0.0122431	0.0208786	0.000851761	0.00635392	0.000483894		83.425	192.565	132.299	10.9131	133.206	5.37899	128.021	9.71882	99%
3	11.4538	87.9723	118.375	0.743163	0.0599961	0.00374837	0.576781	0.0345194	0.0713442	0.00279685	0.0296024	0.00118113		611.13	135.938	462.391	22.2313	444.249	16.8307	589.645	23.187	95%
4	424.533	537.159	1040.63	0.516187	0.120071	0.00356994	5.31904	0.164399	0.318299	0.00920375	0.0980354	0.00294911		1957.1	53.09	1871.93	26.4474	1781.42	45.0161	1890.3	54.2861	95%
5	355.742	158.948	955.426	0.166363	0.117581	0.00414958	5.39993	0.1934	0.322401	0.0114888	0.0996139	0.00802467		1920.37	64.0425	1884.84	30.7107	1801.44	56.0139	1919.33	147.503	95%
6	6.62513	199.9	249.774	0.800322	0.0519582	0.00301663	0.145451	0.00806693	0.020457	0.000668063	0.0063217	0.000274897		283.395	133.315	137.888	7.15153	130.544	4.22087	127.374	5.52138	94%
7	122.019	107.124	204.279	0.524402	0.168082	0.00505913	11.1001	0.368563	0.478949	0.0152721	0.128367	0.00405824		2538.58	50.31	2531.57	30.9759	2522.69	66.5819	2441.07	72.6944	99%
8	5.52074	77.2423	238.244	0.324216	0.0499614	0.00332306	0.138289	0.00879381	0.020627	0.000671387	0.00683687	0.000603032		194.525	155.535	131.519	7.84481	131.617	4.24116	137.718	12.1059	99%
9	8.95443	38.0008	408.946	0.0929239	0.0500854	0.00309856	0.141494	0.00862405	0.0206101	0.000683404	0.00755797	0.00057634		198.23	144.425	134.373	7.67182	131.511	4.31712	152.189	11.5617	97%
10	28.6929	929.154	1049.22	0.885563	0.0510192	0.0023108	0.144647	0.00720055	0.0204504	0.000720645	0.00683841	0.000258068		242.66	71.2875	137.174	6.38808	130.502	4.55302	137.749	5.18071	95%
11	16.9975	207.536	733.461	0.282954	0.0493935	0.00227636	0.139386	0.00618422	0.0207863	0.000634846	0.00589521	0.000277899		164.9	139.795	132.497	5.5119	132.624	4.00978	118.806	5.58404	99%
13	6.90828	64.4996	294.169	0.21926	0.0476735	0.00338447	0.141172	0.00983048	0.0211566	0.000703681	0.00507972	0.000342017		83.425	159.235	134.087	8.74736	134.961	4.44284	102.413	6.87799	99%
14	22.5463	149.005	170.844	0.872174	0.0592466	0.00304623	0.798928	0.0439572	0.0994166	0.0039447	0.0304443	0.00134802		575.96	111.095	596.224	24.8144	610.989	23.132	606.165	26.4414	97%
15	279.893	222.152	596.1	0.372676	0.129995	0.00426608	6.67469	0.243592	0.373006	0.0109514	0.0912441	0.00411789		2097.84	57.7175	2069.28	32.2587	2043.53	51.4297	1764.9	76.2724	98%
16	9.77949	192.093	388.918	0.493916	0.0498656	0.00286347	0.142813	0.00882039	0.0208739	0.000668756	0.00589565	0.000349553		187.12	130.537	135.546	7.83741	133.177	4.22354	118.814	7.02384	98%
17	4.66814	22.6119	199.259	0.11348	0.0520184	0.0054174	0.144728	0.0130795	0.0214737	0.000797638	0.00584949	0.000729936		287.1	240.713	137.247	11.602	136.963	5.03435	117.887	14.6678	99%
19	5.44961	56.0161	221.602	0.252778	0.0496379	0.00364689	0.145291	0.0113031	0.0215043	0.000812148	0.00709734	0.000441589		188.97	153.68	137.745	10.0215	137.156	5.12576	142.946	8.86259	99%
20	270.742	237.827	747.845	0.318017	0.114876	0.00387672	4.77444	0.172214	0.30098	0.00932858	0.0858469	0.00304948		1879.63	61.115	1780.41	30.3065	1696.16	46.2326	1664.68	56.7638	95%
21	4.49092	31.1483	196.618	0.15842	0.0496926	0.00491046	0.136788	0.0116688	0.0207438	0.000767916	0.00648652	0.000750111		188.97	205.525	130.179	10.423	132.355	4.85023	130.684	15.0637	98%
22	4.89122	201.735	147.965	1.36339	0.052554	0.00514632	0.155976	0.0140973	0.0220064	0.000836235	0.00678524	0.000330351		309.32	219.417	147.175	12.3831	140.324	5.27519	136.682	6.63213	95%
24	54.6808	184.721	91.3341	2.02247	0.117039	0.00379242	5.53373	0.183183	0.341969	0.00982663	0.0960665	0.00286344		1922.22	57.56	1905.85	28.4972	1896.14	47.2153	1854.02	52.8038	99%
25	23.691	21.3857	45.5583	0.469413	0.125517	0.00528928	6.63626	0.350875	0.373566	0.0131932	0.103082	0.00452846		2036.11	73.9175	2064.18	46.6765	2046.16	61.9281	1982.98	82.9769	99%
Zhangbang pluton 15DB141
1	7.49127	159.852	273.781	0.583869	0.0499429	0.00305149	0.144087	0.00852833	0.0215312	0.000738642	0.00657863	0.000272875		190.82	142.572	136.677	7.56951	137.326	4.66182	132.533	5.47937	99%
2	10.9371	120.295	467.481	0.257327	0.0480178	0.00218663	0.139132	0.00644623	0.021149	0.000686708	0.00782066	0.000355852		101.94	109.245	132.271	5.74665	134.913	4.33573	157.458	7.13675	98%
3	6.63951	48.5715	308.12	0.157638	0.0491424	0.00324246	0.141988	0.00899054	0.0211869	0.000719905	0.00655762	0.000486137		153.79	148.12	134.813	7.99434	135.153	4.54511	132.111	9.76189	99%
4	8.32132	63.9247	374.22	0.170821	0.0494943	0.00273471	0.144887	0.00744933	0.0215553	0.000693843	0.00662892	0.000353425		172.305	129.613	137.387	6.60736	137.478	4.37905	133.543	7.09646	99%
5	8.16749	100.318	335.813	0.29873	0.0517639	0.00314558	0.153325	0.00904734	0.0217279	0.000712679	0.00670124	0.00034686		275.99	140.722	144.844	7.96585	138.567	4.49715	134.995	6.96415	95%
6	7.99607	66.6942	373.439	0.178595	0.0500799	0.00330511	0.140392	0.00890881	0.0209644	0.000784599	0.00684868	0.000515125		198.23	153.683	133.393	7.93276	133.748	4.95452	137.955	10.341	99%
7	6.57116	44.0202	312.323	0.140945	0.0484726	0.00311407	0.137833	0.00874283	0.0211362	0.000844423	0.00694577	0.000534472		124.16	209.23	131.112	7.80246	134.833	5.33133	139.904	10.7284	97%
8	13.3115	112.338	593.48	0.189286	0.0482179	0.00235876	0.149664	0.00760632	0.022551	0.000857515	0.00601226	0.000314118		109.35	111.09	141.615	6.71859	143.758	5.40654	121.157	6.31108	98%
9	6.1022	47.0744	285.373	0.164958	0.049948	0.00347181	0.144289	0.00935805	0.0215129	0.000853124	0.00649923	0.000499921		190.82	156.46	136.857	8.30437	137.21	5.38428	130.939	10.0393	99%
10	9.92378	89.8635	457.992	0.196212	0.0485921	0.00249295	0.143476	0.00792533	0.0214754	0.000862783	0.00718622	0.000388519		127.865	-72.215	136.136	7.03813	136.974	5.44543	144.73	7.79681	99%
11	7.29304	101.876	301.058	0.338392	0.0507958	0.00316937	0.147543	0.00949341	0.021147	0.000861845	0.00647301	0.000364702		231.55	144.425	139.74	8.40061	134.901	5.44124	130.412	7.32404	96%
12	9.13157	115.873	398.28	0.290934	0.0485958	0.00281708	0.143699	0.00865166	0.0214683	0.000696181	0.00603649	0.000302136		127.865	133.31	136.333	7.68156	136.929	4.39417	121.644	6.0702	99%
13	6.57843	53.5517	291.694	0.183589	0.0501631	0.00295892	0.14601	0.008117	0.0217782	0.000773098	0.00601835	0.000377597		211.185	141.648	138.383	7.19241	138.884	4.87807	121.28	7.58642	99%
14	4.12944	76.5365	119.663	0.639601	0.0517276	0.00556933	0.170542	0.0163402	0.0252542	0.00101022	0.00765204	0.000546399		272.285	248.118	159.889	14.1747	160.777	6.35247	154.076	10.9601	99%
15	4.69067	54.167	195.146	0.277571	0.0519095	0.00452421	0.143332	0.0120987	0.0209432	0.000917241	0.00745216	0.00051879		279.69	199.975	136.008	10.7451	133.614	5.79207	150.066	10.4083	98%
16	6.01455	35.602	261.048	0.136381	0.0489918	0.00429016	0.155131	0.0133468	0.0228325	0.00102798	0.00715671	0.000693535		146.38	196.27	146.432	11.7325	145.532	6.47935	144.138	13.9183	99%
17	10.0939	85.3731	478.11	0.178564	0.0496443	0.00315542	0.142058	0.00860352	0.0211045	0.000822683	0.00591219	0.000331726		188.97	143.5	134.875	7.64978	134.633	5.19425	119.147	6.66551	99%
18	6.93278	53.3365	312.367	0.17075	0.0525299	0.00348922	0.153153	0.00965541	0.0217151	0.00121556	0.00562999	0.000409599		309.32	151.833	144.692	8.50242	138.486	7.66981	113.475	8.23257	95%
19	11.9726	174.049	450.107	0.386684	0.0489167	0.0049205	0.145723	0.0117443	0.0223657	0.000797492	0.00725785	0.000426625		142.68	222.19	138.129	10.4086	142.59	5.02909	146.168	8.5609	96%
21	4.43644	33.9276	216.196	0.15693	0.0515186	0.00389711	0.141626	0.0109056	0.0202791	0.000819321	0.00612533	0.000530473		264.88	174.053	134.491	9.70004	129.419	5.17718	123.429	10.6568	96%
22	7.96092	135.499	324.119	0.418054	0.0491649	0.00252858	0.135323	0.00662829	0.0201955	0.000614668	0.00617512	0.000276624		166.75	120.353	128.87	5.9287	128.891	3.88459	124.429	5.55687	99%
23	8.0364	65.8143	363.012	0.1813	0.0480215	0.00290796	0.143068	0.00987932	0.0213966	0.000881183	0.00710081	0.00053081		101.94	137.015	135.773	8.77624	136.476	5.56196	143.016	10.6532	99%
24	33.3821	115.62	210.847	0.548358	0.0645447	0.00247511	1.11683	0.0492176	0.124634	0.00437498	0.036939	0.00133523		761.115	81.4725	761.456	23.614	757.18	25.0808	733.161	26.0266	99%
25	29.6549	742.772	1032.7	0.719255	0.045394	0.00212654	0.134735	0.0061628	0.0209114	0.000677304	0.00616032	0.000215572				128.343	5.51529	133.414	4.27735	124.132	4.3305	96%

## Sheet: Table S3
Table S3. Whole-rock major and trace element data for the post-collisional early-stage granitoids from the Dabie orogen a.
Categorize	EG	EG	EG	EG	EG	EG	EG	EG	EG	EG	EG	EG	EG	EG	EG	EG	EG	EG	EG	EG	EG	EG	EG	EG	EG	EG	EG
Location	Liangshan	Liangshan	Liangshan	Shangcheng pluton	Shangcheng pluton	Shangcheng pluton	Shangcheng pluton	Shangcheng pluton	Sanjiaoshan pluton	Sanjiaoshan pluton	Tiantangzhai pluton	Tiantangzhai pluton	Tiantangzhai pluton	Tiantangzhai pluton	Egongbao pluton	Egongbao pluton	Egongbao pluton	Egongbao pluton	Fuziling pluton	Fenliupu pluton	Lidian pluton	Datong pluton	Datong pluton	Datong pluton	Datong pluton	Zhangbang	Zhangbang
Region	NHY	NHY	NHY	NHY	NHY	NHY	NHY	NHY	NDB	NDB	NDB	NDB	NDB	NDB	NDB	NDB	NDB	NDB	NDB	SDB	SDB	SDB	SDB	SDB	SDB	SDB	SDB
Longitude (°E)	115.453	115.453	115.453	115.671	115.671	115.671	115.671	115.671	115.401	115.401	115.718	115.718	115.718	115.718	115.837	115.837	115.837	115.837	115.883	115.28	115.277	115.752	115.752	115.752	115.752	115.763	115.763
Latitude (°N)	31.8149	31.8149	31.8149	31.8815	31.8815	31.8815	31.8815	31.8815	31.2601	31.2601	31.1738	31.1738	31.1738	31.1738	31.1823	31.1823	31.1823	31.1823	31.1558	30.4037	30.3628	30.4993	30.4993	30.4993	30.4993	30.4188	30.4188
Age	135.3			137.1						133.2			140		139.1				133.8	136.6				135.5	133.7	136.1
1ϭ	1.8			2.3						2			1.7		2.7				2.2	3.7				3.1	2.7	2.1
Sample NO.	15DB007	15DB009	15DB013	15DB020	15DB023-1	15DB025	15DB028	15DB033	15DB045	15DB052	15DB057	15DB059	15DB064	15DB065	15DB068	15DB069	15DB076	15DB078	15DB105	15DB113	15DB125	15DB129	15DB130	15DB136	15DB138	15DB141	15DB143
Rock type	Granite	Monzogranite	Granodiorite	Monzogranite	Monzogranite	Granite	Granite	Granite	K-feldspar granite	Gneissic granite	Granite	Monzogranite	Granite	Granite	Granodiorite	Granite	Granite	Granite	Granite	Granite	K-feldspar granite	Granite	Granite	K-feldspar granite	K-feldspar granite	Granodiorite	Granite
SiO2	70.4315	70.119	68.5352	70.6933	71.0289	70.3169	70.3909	71.3924	73.0897	74.2174	75.1517	75.3866	73.3327	74.9596	55.784	72.806	71.7411	79.0303	65.8885	73.1114	76.7235	73.6747	75.2384	66.5017	68.5198	65.4346	71.8117
TiO2	0.323895	0.334099	0.433571	0.418953	0.411151	0.481348	0.44328	0.374684	0.262441	0.222875	0.0994728	0.110464	0.229633	0.111111	1.26965	0.261675	0.259714	0.120458	0.458762	0.15089	0.0706571	0.140831	0.07026	0.636235	0.454041	0.594219	0.252042
Al2O3	15.0246	15.2224	16.0524	14.803	14.7012	14.1195	14.9909	14.7949	14.4342	13.9601	13.9262	13.6774	14.4069	13.9495	19.1556	14.3418	15.1633	11.8249	17.851	14.8174	13.2432	14.6062	13.8814	16.5219	15.8208	16.9101	15.183
(Fe2O3)T	2.78968	2.87116	3.10726	2.66334	2.47694	3.30927	2.67983	2.41013	1.46361	1.46895	0.865413	1.0243	1.61741	1.14141	7.23499	1.93237	2.03776	0.511945	3.2725	1.15683	0.605632	1.15683	0.833082	3.57504	2.8655	3.38403	1.94576
MnO	0.0313447	0.0313218	0.0309693	0.0399002	0.0401123	0.0701966	0.0402982	0.0405063	0.0201877	0.0202614	0.0298418	0.0301265	0.0299521	0.020202	0.0705361	0.0201288	0.029967	0.0200763	0.0305842	0.0301781	0.0100939	0.0201187	0.0100371	0.0403959	0.0403592	0.040286	0.030245
MgO	0.428377	0.70996	0.991019	0.798005	0.752106	1.41396	0.836188	0.678481	0.333098	0.384966	0.139262	0.14059	0.379393	0.181818	3.39581	0.392512	0.569374	0.120458	1.12142	0.281662	0.111033	0.251484	0.100371	1.39366	0.948441	1.3798	0.54441
CaO	1.94337	1.75402	2.28141	1.99501	1.9655	2.59727	2.02498	1.84304	1.47371	1.4183	1.05441	0.943965	1.51757	1.27273	4.85691	1.34863	1.94786	0.672556	3.58854	1.57932	0.868073	1.21718	1.01375	2.79741	1.89688	2.50781	1.90543
Na2O	4.10615	4.39549	4.55249	4.56858	4.50261	4.09146	4.78541	4.77975	3.98708	4.01175	4.28728	4.22776	4.38299	4.0202	5.03829	3.40177	4.28529	3.58362	5.61729	4.42611	4.19905	3.99356	3.95463	5.26156	4.97427	5.31776	4.26454
K2O	4.76439	4.41637	3.82988	3.86035	3.96109	3.39952	3.62684	3.51392	4.87534	4.21437	4.42654	4.41856	4.02356	4.30303	2.62999	5.41465	3.89571	4.1056	1.98797	4.39594	4.15868	4.8989	4.88809	2.9691	4.2579	4.08903	3.99234
P2O5	0.156723	0.146168	0.185816	0.159601	0.160449	0.200562	0.181342	0.172152	0.0605632	0.0810455	0.0198946	0.0401687	0.0798722	0.040404	0.564289	0.0805153	0.0699231	0.0100381	0.183505	0.0502968	0.0100939	0.0402374	0.0100371	0.302969	0.221976	0.342431	0.0705716
LOI	3.25	3.61	2.49	0.45	0.56	0.43	0.47	0.34	0.34	0.29	0.17	0.28	0.24	0.19	1.14	0.27	0.57	0.2	1.33	0.42	0.24	0.48	0.37	0.55	1.13	0.38	0.5
Total	99.19	99.62	99.8	100.98	100.59	100.3	100.02	99.29	99.67	99.23	100.81	99.96	100.54	99.3	100.89	99.97	100.99	100.03	99.76	100.05	99.5	100.2	100.22	100.01	100.69	100.29	99.99
Mg#	23.3199	32.8733	38.7123	37.2413	37.5531	45.8349	38.1942	35.7958	31.0692	34.1682	24.1677	21.3732	31.72	23.9819	48.1747	28.6879	35.6239	31.787	40.4291	32.5329	26.6372	30.0963	19.2645	43.5683	39.5957	44.6755	35.6551
2σ	0.466398	0.657466	0.774247	0.744825	0.751063	0.916698	0.763884	0.715917	0.621385	0.683365	0.483353	0.427464	0.6344	0.479637	0.963494	0.573757	0.712477	0.63574	0.808581	0.650659	0.532744	0.601927	0.38529	0.871366	0.791915	0.893511	0.713102
Na2O/K2O	0.861842	0.995272	1.18868	1.18346	1.13671	1.20354	1.31944	1.36023	0.817805	0.951923	0.968539	0.956818	1.08933	0.934272	1.91571	0.628253	1.1	0.872861	2.82564	1.00686	1.00971	0.815195	0.809035	1.77211	1.16825	1.30049	1.06818
2σ	0.0172368	0.0199054	0.0237736	0.0236693	0.0227342	0.0240708	0.0263889	0.0272046	0.0163561	0.0190385	0.0193708	0.0191364	0.0217866	0.0186854	0.0383142	0.0125651	0.022	0.0174572	0.0565128	0.0201373	0.0201942	0.0163039	0.0161807	0.0354422	0.0233649	0.0260099	0.0213636
Na2O+K2O	8.87055	8.81186	8.38237	8.42893	8.4637	7.49097	8.41225	8.29367	8.86242	8.22612	8.71382	8.64631	8.40655	8.32323	7.66828	8.81643	8.181	7.68922	7.60526	8.82205	8.35773	8.89247	8.84272	8.23066	9.23217	9.40679	8.25688
2σ	0.177411	0.176237	0.167647	0.168579	0.169274	0.149819	0.168245	0.165873	0.177248	0.164522	0.174276	0.172926	0.168131	0.166465	0.153366	0.176329	0.16362	0.153784	0.152105	0.176441	0.167155	0.177849	0.176854	0.164613	0.184643	0.188136	0.165138
Sc	2	2	3	3	3	6	3	2	1	1	<1	1	2	<1	9	<1	2	1	3	2	1	1	<1	3	3	3	2
V	43	38	49	48	46	72	49	40	27	23	9	11	24	14	169	46	28	8	48	14	7	11	11	69	46	52	23
Cr	<10	<10	10	10	10	20	10	<10	<10	10	<10	<10	<10	<10	70	<10	<10	<10	10	<10	<10	<10	<10	10	10	20	<10
Co	4	5	4	4	4	6	4	3	2	1	<1	<1	2	1	19	2	2	1	4	1	1	1	<1	7	5	7	3
Ni	1	3	4	5	5	9	4	5	3	3	1	2	4	1	35	4	6	6	11	161	1	2	1	8	8	15	5
Cu	83	77	1	7	2	52	3	2	2	1	1	1	1	1	32	1	1	5	4	30	3	<1	1	4	4	8	1
Zn	24	34	26	68	60	56	57	64	29	32	26	34	46	25	121	23	38	9	72	37	9	26	14	83	76	90	37
Ga	24.1	24.2	23.1	24.3	23.8	21.1	24.1	24.7	21.4	19.9	23.7	21.8	20.7	19.2	29.3	18.3	20.2	13.3	22.1	21.1	14.1	17.7	17.3	22.3	22.2	22.9	18.6
Ge
Cs
Rb	120	111.5	78	105	100.5	120	89.2	111.5	114.5	102	183.5	140	92.7	95.1	84	130	113	70.5	63.1	83.1	53.6	117.5	74.4	62.7	90.5	77.8	107.5
Ba	1320	1505	3250	1735	1955	737	1595	1150	1760	1575	743	570	828	685	2650	2440	2170	1625	1515	1255	1410	2350	1460	2450	2940	3600	1950
Th	8.58	8.58	7.29	10.65	11.7	16.25	10.2	15	21.8	11.2	10.95	7.75	7.98	6.35	19.05	29.3	14.8	4.32	11.3	3.24	5.38	9.24	3.74	5.58	7.34	8.67	13.75
U	1.7	1.8	1.23	2.38	1.75	2.57	1.27	1.94	2.46	0.93	2.3	1.13	1.57	1.1	1.97	0.45	1.48	0.44	1.11	4.22	0.35	2.19	0.59	0.73	0.82	0.95	1.34
Nb	7.2	7	7.6	8.3	7.8	10.7	9.1	9.3	8.2	4.9	6.9	9.3	7.1	3.4	11.4	3.1	7.4	2.7	8.1	8.3	4.4	7.6	3.9	8	9.6	7.9	6.5
Ta	0.5	0.6	0.6	0.7	0.6	1	0.7	0.8	0.7	0.3	0.9	1.1	0.5	0.3	0.8	0.2	0.6	0.2	0.7	0.7	0.2	0.6	0.4	0.5	0.7	0.8	0.8
K	39551.5	36662.4	31793.7	32046.6	32882.9	28221.1	30108.2	29170.8	40472.6	34985.5	36746.9	36680.6	33401.5	35721.5	21832.8	44949.7	32340.2	34082.6	16503.1	36492.8	34523.2	40668.2	40578.4	24647.9	35346.9	33945	33142.3
La	43	52.3	56	53.3	52.5	45.4	56.4	59.8	62.8	36.1	9.2	14.8	26.1	16.4	163	111	46.9	26.9	53.2	15	12.7	18	10.5	44.8	58.2	72.8	39.2
Ce	76.7	89.6	99.7	95.4	94.8	85.9	102.5	105	107	61.4	17.9	28.4	47.2	28.2	278	188.5	77.8	48.7	93.3	27.2	26.3	36.3	19.8	83	104.5	129.5	63.5
Pb	19	19	12	25	24	25	21	25	30	27	57	46	33	35	16	28	41	25	17	52	19	45	29	25	30	26	42
Pr	8.28	9.25	10.9	10.6	10.15	9.55	11.45	11.1	10.9	6.34	1.96	3.24	5.05	2.94	27.1	15.35	7.49	5.18	10	3.08	2.43	3.47	2.27	9.42	11.7	14.55	6.24
Sr	677	693	851	884	904	597	945	700	658	573	284	274	393	350	2070	682	592	169	1700	700	260	511	594	1560	1015	1655	570
P	683.912	637.852	810.867	696.469	700.171	875.214	791.343	751.239	264.287	353.668	86.8162	175.289	348.548	176.316	2462.45	351.354	305.131	43.8046	800.782	219.486	44.0478	175.589	43.8002	1322.1	968.661	1494.31	307.962
Nd	28.7	30.6	37.2	36.2	35.4	33.3	39.4	35.7	34	19.6	7.1	11.4	17.2	9.4	87.6	40.3	23.5	16.5	33.6	10.4	8.4	12.1	8.1	34.6	40.7	51.1	19.9
Zr	181	194	208	219	210	203	229	214	215	145	100	97	135	100	510	240	154	88	214	104	47	127	65	175	212	250	137
Hf	4.9	5.2	5.4	5.8	5.6	5.7	6.1	5.8	5.7	4.2	4.1	3.3	4.2	3.1	11	5.6	4.1	2.9	4.9	3.4	1.8	3.5	1.9	4.2	5.2	6.7	3.9
Sm	4.41	4.67	5.54	5.4	5.31	5.13	6.09	5.39	4.18	2.59	1.35	2.01	2.7	1.39	11.35	3.34	3.25	2.28	5.47	1.77	1.4	1.98	1.55	5.24	6.07	7.44	2.8
Eu	1.24	1.43	1.69	1.44	1.4	1.41	1.64	1.3	1.17	0.9	0.46	0.49	0.7	0.56	3.11	1	0.81	0.98	1.51	0.58	0.54	0.67	0.48	1.68	1.74	2.28	0.78
Ti	1941.75	2002.92	2599.25	2511.62	2464.85	2885.68	2657.46	2246.23	1573.33	1336.13	596.339	662.231	1376.65	666.11	7611.54	1568.74	1556.99	722.143	2750.28	904.586	423.589	844.28	421.208	3814.23	2721.97	3562.34	1510.99
Gd	2.62	2.72	3.65	3.18	3.09	3.38	3.42	3.09	1.86	1.29	0.95	1.56	1.91	0.83	6.36	1.19	1.89	1.18	3.56	1.04	1	1.3	1.07	3.14	3.43	4.34	1.76
Tb	0.29	0.29	0.42	0.34	0.33	0.44	0.37	0.34	0.21	0.13	0.14	0.2	0.22	0.1	0.7	0.11	0.23	0.12	0.47	0.13	0.12	0.15	0.14	0.33	0.37	0.42	0.22
Dy	1.22	1.34	2.16	1.61	1.58	2.31	1.79	1.49	0.91	0.51	0.73	1.01	1.14	0.48	3.45	0.44	1.25	0.57	2.46	0.63	0.59	0.73	0.78	1.53	1.61	1.78	1.15
Y	6.5	6.9	11	8.1	7.8	13.7	9	7.4	4.5	2.6	4.8	6.4	5.8	2.9	16	2.3	7.5	2.8	12.7	3.7	3.2	4.1	4.2	7.5	7.6	7.2	6.7
Ho	0.21	0.22	0.38	0.27	0.27	0.44	0.3	0.24	0.15	0.09	0.14	0.2	0.19	0.09	0.57	0.08	0.25	0.1	0.43	0.11	0.11	0.13	0.14	0.24	0.25	0.27	0.22
Er	0.47	0.51	0.97	0.64	0.65	1.17	0.71	0.56	0.37	0.23	0.41	0.49	0.44	0.23	1.37	0.2	0.69	0.26	1.15	0.29	0.27	0.33	0.35	0.55	0.51	0.58	0.61
Tm	0.06	0.07	0.13	0.09	0.09	0.18	0.1	0.08	0.06	0.03	0.06	0.07	0.06	0.03	0.18	0.03	0.1	0.04	0.16	0.04	0.04	0.05	0.05	0.08	0.07	0.08	0.09
Yb	0.37	0.44	0.87	0.54	0.53	1.24	0.61	0.52	0.38	0.22	0.42	0.46	0.41	0.22	1.03	0.22	0.66	0.26	1	0.26	0.26	0.32	0.31	0.48	0.4	0.47	0.58
Lu	0.06	0.07	0.15	0.09	0.08	0.21	0.1	0.08	0.06	0.04	0.07	0.08	0.07	0.04	0.17	0.04	0.11	0.04	0.16	0.04	0.04	0.05	0.05	0.07	0.07	0.07	0.09
Sr/Y	104.154	100.435	77.3636	109.136	115.897	43.5766	105	94.5946	146.222	220.385	59.1667	42.8125	67.7586	120.69	129.375	296.522	78.9333	60.3571	133.858	189.189	81.25	124.634	141.429	208	133.553	229.861	85.0746
2σ	5.20769	5.02174	3.86818	5.45679	5.79487	2.17883	5.25	4.72973	7.31111	11.0192	2.95833	2.14062	3.38793	6.03448	6.46875	14.8261	3.94667	3.01786	6.69291	9.45946	4.0625	6.23171	7.07143	10.4	6.67763	11.4931	4.25373
Eu/Eu*d	1.11526	1.22664	1.14897	1.06237	1.05664	1.0352	1.09862	0.973853	1.28282	1.50529	1.2418	0.845979	0.942374	1.59392	1.11907	1.53348	0.999162	1.82659	1.04612	1.30692	1.39525	1.27672	1.13948	1.2662	1.16582	1.22667	1.07419
2σ	0.0557629	0.061332	0.0574485	0.0531185	0.0528318	0.0517602	0.0549308	0.0486926	0.0641409	0.0752647	0.0620902	0.0422989	0.0471187	0.0796958	0.0559535	0.0766738	0.0499581	0.0913295	0.052306	0.0653459	0.0697627	0.0638358	0.0569741	0.06331	0.058291	0.0613334	0.0537097
(La/Yb)Ne	83.3618	85.2608	46.171	70.8001	71.0533	26.2624	66.3208	82.4895	118.543	117.702	15.7123	23.0783	45.6622	53.4714	113.514	361.91	50.9717	74.2129	38.1603	41.3827	35.0373	40.3481	24.2956	66.948	104.367	111.105	48.4796
2σ	4.16809	4.26304	2.30855	3.54001	3.55266	1.31312	3.31604	4.12447	5.92716	5.88512	0.785614	1.15392	2.28311	2.67357	5.67572	18.0955	2.54859	3.71065	1.90802	2.06913	1.75187	2.01741	1.21478	3.3474	5.21835	5.55526	2.42398
(Gd/Lu)N	5.39724	4.80278	3.00762	4.36723	4.77409	1.98939	4.22715	4.77409	3.83163	3.98613	1.67744	2.41022	3.37254	2.56472	4.62413	3.67713	2.12369	3.64623	2.75012	3.21363	3.09002	3.21363	2.64506	5.54439	6.05645	7.66326	2.41709
2σ	0.269862	0.240139	0.150381	0.218362	0.238704	0.0994694	0.211358	0.238704	0.191582	0.199307	0.0838721	0.120511	0.168627	0.128236	0.231207	0.183856	0.106184	0.182311	0.137506	0.160681	0.154501	0.160681	0.132253	0.277219	0.302822	0.383163	0.120854
aMajor element data were normalized to 100% withoud LOI; Analytical errors for major and trace elements are around 2% and 5%, respectively.
bMg# =100*MgO/(MgO + 0.9*Fe2O3T);
cA/CNK= molar Al2O3/(CaO+Na2O+K2O)
dEu/Eu* = EuN/(SmN×GdN)1/2.
eSubscript "N" denotes that the element concentrations were normalized bychondrite values of Sun and McDonough (1989) before calculate the ratios.
Analytical errors for major and trace elements are around 2% and 5%.

## Sheet: Table S4
Table S4. Whole-rock Rb-Sr, Sm-Nd and Lu-Hf isotopes data for the post-collisional early-stage and late-stage granitoids from the Dabie orogena.
Categorize	LG	LG	LG	LG	LG	LG	LG	LG	LG	LG	LG	LG	LG	LG	LG	LG	EG	EG	EG	EG	EG	EG	EG	EG	EG	EG	EG	EG	EG	EG	EG	EG	EG
Location	Zhubuyuan	Zhubuyuan	Zhubuyuan	Shiguan	Miaodaoshan	Miaodaoshan	Tianzhushan	Tianzhushan	Yuexi-Qianshan	Yuexi-Qianshan	Yuexi-Qianshan	Linchang	Linchang	Tianzhushan	Tianzhushan	Tianzhushan	Liangshan	Liangshan	Shangcheng pluton	Shangcheng pluton	Sanjiaoshan pluton	Sanjiaoshan pluton	Tiantangzhai pluton	Tiantangzhai pluton	Egongbao pluton	Egongbao pluton	Fuziling pluton	Fenliupu pluton	Lidian pluton	Datong pluton	Datong pluton	Zhangbang	Zhangbang
Sample No.	01ZBY02	01ZBY13	01ZBY15	02SG02	02TL01	02TL02	03TZ02	03TZ03	03TZ05	03TZ08	03TZ10	03TZ12	03TZ14	03TZ17	03TZ20	03TZ22	15DB007	15DB009	15DB020	15DB023-1	15DB045	15DB052	15DB059	15DB064	15DB068	15DB069	15DB105	15DB113	15DB125	15DB136	15DB138	15DB141	15DB143
Rock type	Diorite	Granodiorite	Monzonite	Monzonite	Monzodiorite	Quartz monzonite	Granite	Granodiorite	Quartz monzonite	Granite	Granite	Granite	Granite	Granite	Granite	Granite	Granite	Monzogranite	Monzogranite	Monzogranite	K-feldspar granite	Gneissic granite	Monzogranite	Granite	Granodiorite	Granite	Granite	Granite	K-feldspar granite	K-feldspar granite	K-feldspar granite	Granodiorite	Granite
Age (Ma)	127	127	127	127	134	134	130.05	130.05	130.05	130.05	130.05	130.05	130.05	130.05	130.05	130.05	135.6	135.6	137.1	135	135	132.9	139.9	139.9	139.4	139.4	133.7	137.2	136.7	135.5	135.5	136.1	136.1
Rb(ppm)	39.9	76.8	78.6	56.14	81.59	59.6	169	119	100	97	142	175	196	181	167		120	111.5	105	100.5	114.5	102	140	92.7	84	130	63.1	83.1	53.6	62.7	90.5	77.8	107.5
Sr(ppm)	708.7	736.7	746.8	986	942	1898.1	22.4	444	645	528	185	115	82.8	30.7	49.2		677	693	884	904	658	573	274	393	2070	682	1700	700	260	1560	1015	1655	570
87Rb/86Sr	0.1629	0.301652	0.304537	0.164741	0.25062	0.0908485	21.9135	0.77561	0.448633	0.531559	2.2216	4.40607	6.85709	17.1126	9.83784		0.512912	0.46557	0.343693	0.321683	0.503514	0.515098	1.47876	0.682546	0.117411	0.551631	0.107391	0.343446	0.596734	0.116278	0.257966	0.136003	0.545815
87Sr/86Sr	0.708285	0.708867	0.708544	0.708193	0.708734	0.707794	0.74747	0.709888	0.709226	0.708334	0.711537	0.715346	0.720128	0.740435	0.725647		0.709201	0.709038	0.708819	0.708736	0.708781	0.709059	0.710863	0.709076	0.707974	0.710131	0.707722	0.706973	0.712473	0.706944	0.70754	0.707212	0.710662
2σ	6.04397e-06	5.71001e-06	5.78372e-06	1.06359e-05	7.52211e-06	4.41894e-06	1.96837e-05	3.89449e-06	5.13962e-06	5.21636e-06	5.90834e-06	6.1246e-06	8.60807e-06	3.0173e-05	1.45125e-05		1.31792e-05	1.19318e-05	1.3493e-05	1.35071e-05	1.42974e-05	2.35799e-05	5.48825e-06	1.40113e-05	1.29357e-05	3.0392e-05	4.78298e-06	2.39193e-05	6.09644e-06	1.06928e-05	1.90246e-05	1.55667e-05	6.23305e-06
(87Sr/86Sr)t	0.707997	0.708333	0.708005	0.707902	0.708266	0.707624	0.707736	0.708482	0.708412	0.70737	0.707509	0.707357	0.707694	0.709406	0.707809		0.708231	0.708158	0.708162	0.70813	0.707833	0.708105	0.707979	0.707744	0.707746	0.709059	0.707522	0.706316	0.711336	0.706725	0.707052	0.706954	0.709626
Sm(ppm)	7.13	4.36	8.57	7.697	7.483	5.69	1.01	4.5	4.75	4.09	2.18	2.02	1.49	4.66	4.72	5.32	4.41	4.67	5.4	5.31	4.18	2.59	2.01	2.7	11.35	3.34	5.47	1.77	1.4	5.24	6.07	7.44	2.8
Nd(ppm)	44.44	26.14	53.22	43.22	46.9	36.46	5.92	24.47	25.83	24.33	12.85	13.03	9.7	18.39	20.42	21.82	28.7	30.6	36.2	35.4	34	19.6	11.4	17.2	87.6	40.3	33.6	10.4	8.4	34.6	40.7	51.1	19.9
147Sm/144Nd	0.0969724	0.100814	0.097327	0.107639	0.0964367	0.094327	0.10312	0.111153	0.111152	0.101604	0.102541	0.0937026	0.0928444	0.153172	0.139721	0.147378	0.092876	0.0922449	0.0901626	0.0906635	0.0743086	0.0798699	0.106574	0.0948851	0.0783133	0.0500947	0.0984012	0.102873	0.100736	0.0915343	0.0901377	0.0879968	0.0850426
143Nd/144Nd	0.511508	0.511584	0.511459	0.511522	0.511575	0.511585	0.511602	0.511619	0.51167	0.5115	0.511605	0.511628	0.511594	0.511932	0.511936	0.51192	0.511647	0.511648	0.511595	0.511595	0.511601	0.511578	0.511795	0.511805	0.511617	0.511685	0.511701	0.511778	0.511536	0.511471	0.51131	0.511335	0.511498
2σ	3.46609e-06	6.30875e-06	3.30916e-06	1.01048e-05	1.784e-05	2.06896e-05	1.21539e-05	6.0202e-06	2.79268e-06	5.58706e-06	5.43134e-06	5.36559e-06	5.8054e-06	5.81274e-06	5.48454e-06	1.86362e-05	8.30685e-06	8.02908e-06	8.2714e-06	6.66337e-06	6.92318e-06	1.53065e-05	7.7008e-06	1.27967e-05	4.74807e-06	7.25571e-06	8.06454e-06	1.46815e-05	5.92203e-06	7.39159e-06	8.60909e-06	5.86637e-06	4.08987e-06
εNd(t)	-20.2791	-18.8669	-21.2432	-20.1808	-18.8772	-18.6497	-18.5096	-18.3239	-17.3282	-20.4911	-18.4498	-17.8628	-18.5031	-12.9071	-12.6082	-13.0401	-17.3877	-17.3731	-18.347	-18.3811	-17.9753	-18.5588	-14.6955	-14.2853	-17.6645	-15.843	-16.4621	-14.9995	-19.6777	-20.8007	-23.9236	-23.4001	-20.157
2σ	0.0676349	0.123105	0.0645727	0.197178	0.348117	0.403723	0.237163	0.117474	0.0544944	0.109022	0.105983	0.1047	0.113283	0.113426	0.107022	0.363654	0.162094	0.156674	0.161402	0.130024	0.135094	0.29868	0.150268	0.249706	0.0926505	0.141583	0.157366	0.286484	0.115558	0.144234	0.167992	0.114472	0.0798069
fSm/Nd	-0.505243	-0.485643	-0.503434	-0.45082	-0.507976	-0.51874	-0.473879	-0.432891	-0.432897	-0.48161	-0.476834	-0.521926	-0.526304	-0.218509	-0.287136	-0.248073	-0.526143	-0.529363	-0.539987	-0.537431	-0.620874	-0.5925	-0.456253	-0.515892	-0.600442	-0.744415	-0.497953	-0.475139	-0.486042	-0.532988	-0.540114	-0.551037	-0.566109
Lu(ppm)	0.31	0.18	0.28	0.298	0.343	0.174	0.15	0.27	0.22	0.19	0.15	0.17	0.17	0.31	0.28	0.41	0.06		0.09			0.04	0.08	0.07		0.04	0.16	0.04	0.04	0.07		0.07	0.09
Hf(ppm)	5.1	4.71	7.6	6.471	7.811	10.24	2.61	3.52	4.26	3.75	2.41	2.94	2.48	4.15	8.74	4.26	4.9		5.8			4.2	3.3	4.2		5.6	4.9	3.4	1.8	4.2		6.7	3.9
176Lu/177Hf	0.00863433	0.00542861	0.00523337	0.00654157	0.0062377	0.00241372	0.00816372	0.0108958	0.00733585	0.00719713	0.0088412	0.0082137	0.00973721	0.0106109	0.00455076	0.0136713	0.00173937		0.0022042			0.00135284	0.0034436	0.00236748		0.00101463	0.00463832	0.00167116	0.00315664	0.00236748		0.00148409	0.00327805
176Hf/177Hf	0.281916	0.28198	0.281882	0.281889	0.281999	0.281991	0.281978	0.282049	0.282049	0.281901	0.281997	0.282001	0.282004	0.282235	0.282231	0.282226	0.282019		0.281962			0.282036	0.282206	0.282198		0.282119	0.282163	0.282083	0.28194	0.281852		0.281783	0.282063
2σ	3.20136e-06	2.98237e-06	5.41587e-06	6.66355e-06	1.26413e-05	6.04937e-06	2.98091e-06	2.17356e-06	1.67164e-06	2.53835e-06	3.15951e-06	1.92684e-06	2.0735e-06	7.73627e-06	2.37887e-06	7.81626e-06	1.06668e-05		1.71455e-05			1.44721e-05	3.35719e-06	1.20219e-05		1.30671e-05	1.90244e-06	1.16433e-05	3.53279e-06	1.41921e-05		1.3658e-05	3.06817e-06
εHf(t)	-28.5876	-26.0595	-29.4951	-29.3721	-25.4633	-25.4096	-26.3687	-24.07	-23.7617	-29.0001	-25.7438	-25.5573	-25.5926	-17.4886	-17.117	-18.0453	-24.3633		-26.4091			-23.7151	-17.9282	-18.0852		-20.7731	-19.5279	-22.0872	-27.2931	-30.3185		-32.6982	-22.9332
2σ	0.113541	0.105774	0.192081	0.236332	0.448341	0.214549	0.105722	0.0770882	0.059287	0.090026	0.112056	0.068338	0.0735395	0.274378	0.0843698	0.277214	0.378312		0.608088			0.513274	0.119067	0.426373		0.463441	0.0674726	0.412946	0.125295	0.503342		0.484401	0.108817
fLu/Hf	-0.743026	-0.838434	-0.844245	-0.80531	-0.814354	-0.928163	-0.757032	-0.675721	-0.781671	-0.7858	-0.736869	-0.755545	-0.710202	-0.684201	-0.864561	-0.593115	-0.948233		-0.934399			-0.959737	-0.897512	-0.929539		-0.969803	-0.861955	-0.950263	-0.906052	-0.929539		-0.955831	-0.902439
aThe initial isotopic ratios are calculated according to the reported ages for individual plutons based on the LA-ICP-MS U-Pb dating and whole-rock Rb, Sr, Sm, Nd, Lu and Hf contents were measured by ICP-MS.

## Sheet: Table S5
Table S5. Parameters used in whole-rock and garnet Hf isotope ingrowth calculation in Figure 3Ca.
Sample No.	Lu	Hf	176Lu/177Hf	176Hf/177Hf	εHf(230 Ma)	εHf(130 Ma)
04HZ44a (E1)
BombWR	0.341	1.97	0.025	0.282757	0.39	-0.21
SavWR	0.328	0.515	0.09	0.28315	4.3	8.05
E1-Grt1	1.08	0.191	0.804	0.286154	2.09	53.06
E1-Grt2	1.07	0.206	0.738	0.285836	0.74	47.4
E1-Grt3	1.08	0.182	0.845	0.286298	0.83	54.56
04HZ15b (E2)
BombWR	0.371	3.29	0.016	0.282291	-14.81	-15.97
SavWR	0.364	0.813	0.064	0.28248	-15.34	-13.36
E2-Grt1	0.695	0.103	0.959	0.286532	-8.11	53.12
E2-Grt2	0.93	0.327	0.403	0.283904	-16.67	7.82
E2-Grt3	1.02	0.251	0.578	0.284564	-19.89	16.16
E2-Grt4	1.01	0.572	0.249	0.283269	-15.71	-1.42
04SM20a (E3)
BombWR	0.438	5.22	0.012	0.282135	-19.7	-21.13
SavWR	0.442	0.489	0.128	0.282632	-19.81	-13.54
E3-Grt1	0.896	0.159	0.8	0.285396	-24.22	26.53
E3-Grt2	0.894	0.128	0.989	0.286392	-17.71	45.55
E3-Grt3	0.893	0.096	1.324	0.287779	-19.57	65.85
E3-Grt4	0.889	0.194	0.651	0.284856	-20.66	20.23
TH12 (E4)
BombWR	0.242	2.2	0.016	0.282435	-9.65	-10.83
SavWR	0.234	0.38	0.087	0.282752	-9.33	-5.78
E4-Grt2	0.93	0.199	0.663	0.285132	-12.73	28.95
E4-Grt3	0.975	0.221	0.627	0.284975	-12.69	26.56
E4-Grt4	0.938	0.184	0.718	0.285338	-13.78	31.53
Data sources:
Cheng, H., King, R. L., Nakamura, E., Vervoort, J. D., and Zhou, Z., 2008, Coupled Lu–Hf and Sm–Nd geochronology constrains garnet growth in ultra‐high‐pressure eclogites from the Dabie orogen: Journal of Metamorphic Geology, v. 26(7), p. 741-758, https://doi.org/10.1111/j.1525-1314.2008.00785.x
Cheng, H., Nakamura, E., and Zhou, Z., 2009, Garnet Lu–Hf dating of retrograde fluid activity during ultrahigh-pressure metamorphic eclogites exhumation: Mineralogy and Petrology, v. 95(3-4), p. 315-326, https://doi.org/10.1007/s00710-008-0030-5.

## Sheet: Table S6
Table S6. The composition of Dabie eclogites and garnet within them, and the effective bulk composition of these eclogites that underwent partial meltinga.
	Original eclogites					Original garnet in eclogitesc					Modal content of garnet in the original eclogitesd	Original eclogites minus garnet component
Sample No.	Lu	Hf	Gdb	εHf(130)	(Gd/Lu)N	Lu	Hf	Gd	εHf(130)	(Gd/Lu)N	wt.%	Lu	Hf	Gd	εHf(130)	(Gd/Lu)N
04HZ44a-B-W (E1)	0.341	1.97	0.9	-0.212498	0.326	0.93	0.199	2.731	28.9505	0.360104	10	0.248	1.94848	0.696556	-0.212498	0.347157
04HZ15a-B-W (E2)	0.371	3.29	0.9	-15.9655	0.3	0.93	0.199	2.731	28.9505	0.360104	10	0.278	3.26848	0.696556	-15.9655	0.309694
04SM20a-B-W (E3)	0.438	5.22	0.9	-21.129	0.254	0.93	0.199	2.731	28.9505	0.360104	10	0.345	5.19848	0.696556	-21.129	0.249551
TH12-B-W (E4)	0.242	2.2	0.9	-10.8349	0.459	0.93	0.199	2.731	28.9505	0.360104	10	0.149	2.17848	0.696556	-10.8349	0.577818
04HZ44a-S-W (E1)	0.328	0.515	0.9	8.05022	0.339	0.93	0.199	2.731	28.9505	0.360104	10	0.235	0.49348	0.696556	8.05022	0.366361
04HZ15a-S-W (E2)	0.364	0.813	0.9	-13.3586	0.305	0.93	0.199	2.731	28.9505	0.360104	10	0.271	0.79148	0.696556	-13.3586	0.317694
04SM20a-S-W (E3)	0.442	0.489	0.9	-13.5418	0.252	0.93	0.199	2.731	28.9505	0.360104	10	0.349	0.46748	0.696556	-13.5418	0.24669
TH12-S-W (E4)	0.234	0.38	0.9	-5.77827	0.475	0.93	0.199	2.731	28.9505	0.360104	10	0.141	0.35848	0.696556	-5.77827	0.610602
Sample No.	Li	Be	Sc	V	Cr	Co	Ni	Cu	Zn	Ga	Rb	Sr	Y	Zr	Nb	Mo	Sn	Cs	Ba	La	Ce	Pr	Nd	Sm	Eu	Gd	Tb	Dy	Ho	Er	Tm	Yb	Lu	Hf	Ta	Tl	Pb	Th	U
09DB30	1.32735	0.501232	3.50217	18.0122	15.8712	5.25928	9.34971	12.5693	23.4266	5.44514	14.253	1712.53	5.23016	39.95	2.12882	0.239753	0.411896	0.0677665	308.397	8.31982	14.1129	1.47269	5.72554	1.09809	0.293018	0.899527	0.134713	0.745011	0.155323	0.448808	0.0727475	0.514695	0.0680421	1.06526	0.196879	0.0808772	10.466	2.21677	1.04306
a all the compositional data excepts Gd are adopted from Cheng et al. (2008, 2009).
b the Gd value adopted from sample 09DB30, a Trassic eclogite sample from the Shuanghe area in the Dabie orogen that kindly shared by Prof. X.Y. Gao.
ccompositions adopted from Garnet 2 of eclogite sample TH12 from Cheng et al. (2009) for all the necessary data has been reported for this garnet;
d the modal content of garnet in these eclogites is assumed to be 10 wt%, which is a reasonable value for garnet-poor eclogites (Feng et al., 2021) and consistent with the observed amout of residual garnet in Run 3124 of Qian and Hermann (2013).

## Sheet: Table S7
Table S7. Bulk partitioning coefficients between melt and eclogitic rock and the composition of anatectic melts from the Dabie eclogitesa.
Bulk DGd(M/R)	Bulk DLu(M/R)	Bulk DHf(M/R)	Sample No.	Lu	Hf	Gd	εHf(130)b	(Gd/Lu)N
1	0.477381	2.04124	04HZ44a-B-W-derived melt (E1-M)	0.11839	3.97731	0.696556	-0.212498	0.727212
			04HZ15a-B-W-derived melt (E2-M)	0.132712	6.67174	0.696556	-15.9655	0.648736
			04SM20a-B-W-derived melt (E3-M)	0.164696	10.6113	0.696556	-21.129	0.522749
			TH12-B-W-derived melt (E4-M)	0.0711298	4.44679	0.696556	-10.8349	1.21039
athe bulk D for Gd, Lu, and Hf are adopted from Run 3124 of Qian and Hermann (2013).
badopted from eclogite whole-rock assuming equilibrium melting for these garnet-poor source rocks.

## Sheet: Table S8
Table S8. The composition of peritectic garnets produced by the partial melting reaction of the Dabie eclogites that calculated using bulk partitioning coefficients between garnet and melta.
Bulk DGd(GRT/M)	Bulk DLu(Grt/M)	Bulk DHf(Grt/M)	Sample No.	Lu	Hf	Gd	εHf(130)b	(Gd/Lu)N
3.149	11.129	0.384	04HZ44a-B-W-derived peritectic garnet (E1-PG)	1.31757	1.52729	2.19345	-0.212498	0.205768
			04HZ15a-B-W-derived peritectic garnet (E2-PG)	1.47695	2.56195	2.19345	-15.9655	0.183563
			04SM20a-B-W-derived peritectic garnet (E3-PG)	1.83291	4.07475	2.19345	-21.129	0.147914
			TH12-B-W-derived peritectic garnet (E4-PG)	0.791603	1.70757	2.19345	-10.8349	0.342486
athe bulk D for Gd, Lu, and Hf are adopted from Run 3124 of Qian and Hermann (2013).
bthe peritectic garnet should have the same Hf isotope composition to the anatectic melts that adopted from eclogite whole-rock assuming equilibrium melting for these garnet-poor source rocks.

## Sheet: Table S9
Table S9. Modeling results for residual garnet entrainment.
Garnet-clean melt endmember	Entrinment residual garnet	Amount of entrainment residual garnet (wt.%)	εHf(t)	(Gd/Lu)N
04HZ44a-B-W-derived melt (E1-M)	Grt1	0	-0.2125	0.72721
04HZ44a-B-W-derived melt (E1-M)	Grt1	0.1	5.11475	0.33131
04HZ44a-B-W-derived melt (E1-M)	Grt1	0.2	10.442	0.3211
04HZ44a-B-W-derived melt (E1-M)	Grt1	0.3	15.7692	0.31758
04HZ44a-B-W-derived melt (E1-M)	Grt1	0.4	21.0965	0.3158
04HZ44a-B-W-derived melt (E1-M)	Grt1	0.5	26.4237	0.31472
04HZ44a-B-W-derived melt (E1-M)	Grt1	0.6	31.751	0.314
04HZ44a-B-W-derived melt (E1-M)	Grt1	0.7	37.0782	0.31348
04HZ44a-B-W-derived melt (E1-M)	Grt1	0.8	42.4055	0.3131
04HZ44a-B-W-derived melt (E1-M)	Grt1	0.9	47.7328	0.31279
04HZ44a-B-W-derived melt (E1-M)	Grt1	1	53.06	0.31255
04HZ44a-B-W-derived melt (E1-M)	Grt2	0	-0.2125	0.72721
04HZ44a-B-W-derived melt (E1-M)	Grt2	0.1	4.54875	0.33567
04HZ44a-B-W-derived melt (E1-M)	Grt2	0.2	9.31	0.3247
04HZ44a-B-W-derived melt (E1-M)	Grt2	0.3	14.0712	0.3209
04HZ44a-B-W-derived melt (E1-M)	Grt2	0.4	18.8325	0.31898
04HZ44a-B-W-derived melt (E1-M)	Grt2	0.5	23.5938	0.31782
04HZ44a-B-W-derived melt (E1-M)	Grt2	0.6	28.355	0.31704
04HZ44a-B-W-derived melt (E1-M)	Grt2	0.7	33.1163	0.31648
04HZ44a-B-W-derived melt (E1-M)	Grt2	0.8	37.8775	0.31606
04HZ44a-B-W-derived melt (E1-M)	Grt2	0.9	42.6388	0.31573
04HZ44a-B-W-derived melt (E1-M)	Grt2	1	47.4	0.31547
04HZ44a-B-W-derived melt (E1-M)	Grt3	0	-0.2125	0.72721
04HZ44a-B-W-derived melt (E1-M)	Grt3	0.1	5.26475	0.33046
04HZ44a-B-W-derived melt (E1-M)	Grt3	0.2	10.742	0.32071
04HZ44a-B-W-derived melt (E1-M)	Grt3	0.3	16.2192	0.31735
04HZ44a-B-W-derived melt (E1-M)	Grt3	0.4	21.6965	0.31565
04HZ44a-B-W-derived melt (E1-M)	Grt3	0.5	27.1737	0.31462
04HZ44a-B-W-derived melt (E1-M)	Grt3	0.6	32.651	0.31393
04HZ44a-B-W-derived melt (E1-M)	Grt3	0.7	38.1283	0.31344
04HZ44a-B-W-derived melt (E1-M)	Grt3	0.8	43.6055	0.31307
04HZ44a-B-W-derived melt (E1-M)	Grt3	0.9	49.0827	0.31278
04HZ44a-B-W-derived melt (E1-M)	Grt3	1	54.56	0.31255
04HZ15a-B-W-derived melt (E2-M)	Grt1	0	-15.9655	0.64874
04HZ15a-B-W-derived melt (E2-M)	Grt1	0.1	-9.05694	0.4899
04HZ15a-B-W-derived melt (E2-M)	Grt1	0.2	-2.14839	0.48759
04HZ15a-B-W-derived melt (E2-M)	Grt1	0.3	4.76016	0.4868
04HZ15a-B-W-derived melt (E2-M)	Grt1	0.4	11.6687	0.48641
04HZ15a-B-W-derived melt (E2-M)	Grt1	0.5	18.5773	0.48617
04HZ15a-B-W-derived melt (E2-M)	Grt1	0.6	25.4858	0.48601
04HZ15a-B-W-derived melt (E2-M)	Grt1	0.7	32.3944	0.4859
04HZ15a-B-W-derived melt (E2-M)	Grt1	0.8	39.3029	0.48581
04HZ15a-B-W-derived melt (E2-M)	Grt1	0.9	46.2114	0.48574
04HZ15a-B-W-derived melt (E2-M)	Grt1	1	53.12	0.48569
04HZ15a-B-W-derived melt (E2-M)	Grt2	0	-15.9655	0.64874
04HZ15a-B-W-derived melt (E2-M)	Grt2	0.1	-13.5869	0.37989
04HZ15a-B-W-derived melt (E2-M)	Grt2	0.2	-11.2084	0.37074
04HZ15a-B-W-derived melt (E2-M)	Grt2	0.3	-8.82984	0.36755
04HZ15a-B-W-derived melt (E2-M)	Grt2	0.4	-6.45129	0.36593
04HZ15a-B-W-derived melt (E2-M)	Grt2	0.5	-4.07274	0.36495
04HZ15a-B-W-derived melt (E2-M)	Grt2	0.6	-1.6942	0.36429
04HZ15a-B-W-derived melt (E2-M)	Grt2	0.7	0.68435	0.36382
04HZ15a-B-W-derived melt (E2-M)	Grt2	0.8	3.0629	0.36346
04HZ15a-B-W-derived melt (E2-M)	Grt2	0.9	5.44145	0.36318
04HZ15a-B-W-derived melt (E2-M)	Grt2	1	7.82	0.36296
04HZ15a-B-W-derived melt (E2-M)	Grt3	0	-15.9655	0.64874
04HZ15a-B-W-derived melt (E2-M)	Grt3	0.1	-12.7529	0.34435
04HZ15a-B-W-derived melt (E2-M)	Grt3	0.2	-9.54039	0.33704
04HZ15a-B-W-derived melt (E2-M)	Grt3	0.3	-6.32784	0.33452
04HZ15a-B-W-derived melt (E2-M)	Grt3	0.4	-3.11529	0.33325
04HZ15a-B-W-derived melt (E2-M)	Grt3	0.5	0.09726	0.33248
04HZ15a-B-W-derived melt (E2-M)	Grt3	0.6	3.3098	0.33197
04HZ15a-B-W-derived melt (E2-M)	Grt3	0.7	6.52235	0.3316
04HZ15a-B-W-derived melt (E2-M)	Grt3	0.8	9.7349	0.33132
04HZ15a-B-W-derived melt (E2-M)	Grt3	0.9	12.9474	0.33111
04HZ15a-B-W-derived melt (E2-M)	Grt3	1	16.16	0.33094
04HZ15a-B-W-derived melt (E2-M)	Grt4	0	-15.9655	0.64874
04HZ15a-B-W-derived melt (E2-M)	Grt4	0.1	-14.5109	0.36317
04HZ15a-B-W-derived melt (E2-M)	Grt4	0.2	-13.0564	0.34777
04HZ15a-B-W-derived melt (E2-M)	Grt4	0.3	-11.6018	0.34227
04HZ15a-B-W-derived melt (E2-M)	Grt4	0.4	-10.1473	0.33944
04HZ15a-B-W-derived melt (E2-M)	Grt4	0.5	-8.69274	0.33772
04HZ15a-B-W-derived melt (E2-M)	Grt4	0.6	-7.2382	0.33656
04HZ15a-B-W-derived melt (E2-M)	Grt4	0.7	-5.78365	0.33572
04HZ15a-B-W-derived melt (E2-M)	Grt4	0.8	-4.3291	0.3351
04HZ15a-B-W-derived melt (E2-M)	Grt4	0.9	-2.87455	0.33461
04HZ15a-B-W-derived melt (E2-M)	Grt4	1	-1.42	0.33421
04SM20a-B-W-derived melt (E3-M)	Grt1	0	-21.129	0.52275
04SM20a-B-W-derived melt (E3-M)	Grt1	0.1	-16.3631	0.38027
04SM20a-B-W-derived melt (E3-M)	Grt1	0.2	-11.5972	0.37833
04SM20a-B-W-derived melt (E3-M)	Grt1	0.3	-6.83131	0.37767
04SM20a-B-W-derived melt (E3-M)	Grt1	0.4	-2.06541	0.37734
04SM20a-B-W-derived melt (E3-M)	Grt1	0.5	2.70049	0.37714
04SM20a-B-W-derived melt (E3-M)	Grt1	0.6	7.46639	0.377
04SM20a-B-W-derived melt (E3-M)	Grt1	0.7	12.2323	0.37691
04SM20a-B-W-derived melt (E3-M)	Grt1	0.8	16.9982	0.37684
04SM20a-B-W-derived melt (E3-M)	Grt1	0.9	21.7641	0.37678
04SM20a-B-W-derived melt (E3-M)	Grt1	1	26.53	0.37673
04SM20a-B-W-derived melt (E3-M)	Grt2	0	-21.129	0.52275
04SM20a-B-W-derived melt (E3-M)	Grt2	0.1	-14.4611	0.38042
04SM20a-B-W-derived melt (E3-M)	Grt2	0.2	-7.79321	0.37886
04SM20a-B-W-derived melt (E3-M)	Grt2	0.3	-1.12531	0.37833
04SM20a-B-W-derived melt (E3-M)	Grt2	0.4	5.54259	0.37806
04SM20a-B-W-derived melt (E3-M)	Grt2	0.5	12.2105	0.3779
04SM20a-B-W-derived melt (E3-M)	Grt2	0.6	18.8784	0.37779
04SM20a-B-W-derived melt (E3-M)	Grt2	0.7	25.5463	0.37772
04SM20a-B-W-derived melt (E3-M)	Grt2	0.8	32.2142	0.37766
04SM20a-B-W-derived melt (E3-M)	Grt2	0.9	38.8821	0.37761
04SM20a-B-W-derived melt (E3-M)	Grt2	1	45.55	0.37758
04SM20a-B-W-derived melt (E3-M)	Grt3	0	-21.129	0.52275
04SM20a-B-W-derived melt (E3-M)	Grt3	0.1	-12.4311	0.38014
04SM20a-B-W-derived melt (E3-M)	Grt3	0.2	-3.73321	0.37896
04SM20a-B-W-derived melt (E3-M)	Grt3	0.3	4.96469	0.37856
04SM20a-B-W-derived melt (E3-M)	Grt3	0.4	13.6626	0.37836
04SM20a-B-W-derived melt (E3-M)	Grt3	0.5	22.3605	0.37824
04SM20a-B-W-derived melt (E3-M)	Grt3	0.6	31.0584	0.37816
04SM20a-B-W-derived melt (E3-M)	Grt3	0.7	39.7563	0.3781
04SM20a-B-W-derived melt (E3-M)	Grt3	0.8	48.4542	0.37806
04SM20a-B-W-derived melt (E3-M)	Grt3	0.9	57.1521	0.37803
04SM20a-B-W-derived melt (E3-M)	Grt3	1	65.85	0.378
04SM20a-B-W-derived melt (E3-M)	Grt4	0	-21.129	0.52275
04SM20a-B-W-derived melt (E3-M)	Grt4	0.1	-16.9931	0.38393
04SM20a-B-W-derived melt (E3-M)	Grt4	0.2	-12.8572	0.38161
04SM20a-B-W-derived melt (E3-M)	Grt4	0.3	-8.72131	0.38082
04SM20a-B-W-derived melt (E3-M)	Grt4	0.4	-4.58541	0.38042
04SM20a-B-W-derived melt (E3-M)	Grt4	0.5	-0.44951	0.38018
04SM20a-B-W-derived melt (E3-M)	Grt4	0.6	3.68639	0.38002
04SM20a-B-W-derived melt (E3-M)	Grt4	0.7	7.8223	0.37991
04SM20a-B-W-derived melt (E3-M)	Grt4	0.8	11.9582	0.37982
04SM20a-B-W-derived melt (E3-M)	Grt4	0.9	16.0941	0.37975
04SM20a-B-W-derived melt (E3-M)	Grt4	1	20.23	0.3797
TH12-B-W-derived melt (E4-M)	Grt2	0	-10.8349	1.21039
TH12-B-W-derived melt (E4-M)	Grt2	0.1	-6.8564	0.38829
TH12-B-W-derived melt (E4-M)	Grt2	0.2	-2.87791	0.37441
TH12-B-W-derived melt (E4-M)	Grt2	0.3	1.10058	0.36968
TH12-B-W-derived melt (E4-M)	Grt2	0.4	5.07907	0.36729
TH12-B-W-derived melt (E4-M)	Grt2	0.5	9.05756	0.36585
TH12-B-W-derived melt (E4-M)	Grt2	0.6	13.036	0.36489
TH12-B-W-derived melt (E4-M)	Grt2	0.7	17.0145	0.3642
TH12-B-W-derived melt (E4-M)	Grt2	0.8	20.993	0.36369
TH12-B-W-derived melt (E4-M)	Grt2	0.9	24.9715	0.36328
TH12-B-W-derived melt (E4-M)	Grt2	1	28.95	0.36296
TH12-B-W-derived melt (E4-M)	Grt3	0	-10.8349	1.21039
TH12-B-W-derived melt (E4-M)	Grt3	0.1	-7.0954	0.37352
TH12-B-W-derived melt (E4-M)	Grt3	0.2	-3.35591	0.35856
TH12-B-W-derived melt (E4-M)	Grt3	0.3	0.38358	0.35346
TH12-B-W-derived melt (E4-M)	Grt3	0.4	4.12307	0.35088
TH12-B-W-derived melt (E4-M)	Grt3	0.5	7.86256	0.34933
TH12-B-W-derived melt (E4-M)	Grt3	0.6	11.602	0.34829
TH12-B-W-derived melt (E4-M)	Grt3	0.7	15.3415	0.34755
TH12-B-W-derived melt (E4-M)	Grt3	0.8	19.081	0.34699
TH12-B-W-derived melt (E4-M)	Grt3	0.9	22.8205	0.34656
TH12-B-W-derived melt (E4-M)	Grt3	1	26.56	0.34621
TH12-B-W-derived melt (E4-M)	Grt4	0	-10.8349	1.21039
TH12-B-W-derived melt (E4-M)	Grt4	0.1	-6.5984	0.38323
TH12-B-W-derived melt (E4-M)	Grt4	0.2	-2.36191	0.37041
TH12-B-W-derived melt (E4-M)	Grt4	0.3	1.87458	0.36605
TH12-B-W-derived melt (E4-M)	Grt4	0.4	6.11107	0.36385
TH12-B-W-derived melt (E4-M)	Grt4	0.5	10.3476	0.36253
TH12-B-W-derived melt (E4-M)	Grt4	0.6	14.584	0.36164
TH12-B-W-derived melt (E4-M)	Grt4	0.7	18.8205	0.36101
TH12-B-W-derived melt (E4-M)	Grt4	0.8	23.057	0.36053
TH12-B-W-derived melt (E4-M)	Grt4	0.9	27.2935	0.36016
TH12-B-W-derived melt (E4-M)	Grt4	1	31.53	0.35987
15DB141	Grt1	0	-32.5864	7.66326
15DB141	Grt1	0.1	-24.0217	0.432788
15DB141	Grt1	0.2	-15.4571	0.366479
15DB141	Grt1	0.3	-6.89247	0.344105
15DB141	Grt1	0.4	1.67217	0.332867
15DB141	Grt1	0.5	10.2368	0.326107
15DB141	Grt1	0.6	18.8014	0.321594
15DB141	Grt1	0.7	27.3661	0.318366
15DB141	Grt1	0.8	35.9307	0.315944
15DB141	Grt1	0.9	44.4954	0.314059
15DB141	Grt1	1	53.06	0.31255
15DB141	Grt2	0	-32.5864	7.66326
15DB141	Grt2	0.1	-24.5877	0.446123
15DB141	Grt2	0.2	-16.5891	0.374118
15DB141	Grt2	0.3	-8.59047	0.349796
15DB141	Grt2	0.4	-0.591829	0.337574
15DB141	Grt2	0.5	7.40681	0.330221
15DB141	Grt2	0.6	15.4054	0.325311
15DB141	Grt2	0.7	23.4041	0.3218
15DB141	Grt2	0.8	31.4027	0.319164
15DB141	Grt2	0.9	39.4014	0.317113
15DB141	Grt2	1	47.4	0.315471
15DB141	Grt3	0	-32.5864	7.66326
15DB141	Grt3	0.1	-23.8717	0.427211
15DB141	Grt3	0.2	-15.1571	0.363956
15DB141	Grt3	0.3	-6.44247	0.342625
15DB141	Grt3	0.4	2.27217	0.331912
15DB141	Grt3	0.5	10.9868	0.325469
15DB141	Grt3	0.6	19.7014	0.321168
15DB141	Grt3	0.7	28.4161	0.318093
15DB141	Grt3	0.8	37.1307	0.315784
15DB141	Grt3	0.9	45.8454	0.313988
15DB141	Grt3	1	54.56	0.31255
15DB141	Grt1	0	-32.5864	7.66326
15DB141	Grt1	0.1	-24.0157	0.584337
15DB141	Grt1	0.2	-15.4451	0.52987
15DB141	Grt1	0.3	-6.87447	0.511528
15DB141	Grt1	0.4	1.69617	0.502321
15DB141	Grt1	0.5	10.2668	0.496786
15DB141	Grt1	0.6	18.8374	0.493091
15DB141	Grt1	0.7	27.4081	0.490449
15DB141	Grt1	0.8	35.9787	0.488467
15DB141	Grt1	0.9	44.5494	0.486924
15DB141	Grt1	1	53.12	0.48569
15DB141	Grt2	0	-32.5864	7.66326
15DB141	Grt2	0.1	-28.5457	0.5966
15DB141	Grt2	0.2	-24.5051	0.468681
15DB141	Grt2	0.3	-20.4645	0.425005
15DB141	Grt2	0.4	-16.4238	0.402968
15DB141	Grt2	0.5	-12.3832	0.389682
15DB141	Grt2	0.6	-8.34255	0.380797
15DB141	Grt2	0.7	-4.30191	0.374437
15DB141	Grt2	0.8	-0.261276	0.36966
15DB141	Grt2	0.9	3.77936	0.36594
15DB141	Grt2	1	7.82	0.362962
15DB141	Grt3	0	-32.5864	7.66326
15DB141	Grt3	0.1	-27.7117	0.496759
15DB141	Grt3	0.2	-22.8371	0.405573
15DB141	Grt3	0.3	-17.9625	0.374659
15DB141	Grt3	0.4	-13.0878	0.359104
15DB141	Grt3	0.5	-8.21319	0.349738
15DB141	Grt3	0.6	-3.33855	0.343481
15DB141	Grt3	0.7	1.53609	0.339006
15DB141	Grt3	0.8	6.41072	0.335645
15DB141	Grt3	0.9	11.2854	0.33303
15DB141	Grt3	1	16.16	0.330936
15DB141	Grt4	0	-32.5864	7.66326
15DB141	Grt4	0.1	-29.4697	0.70477
15DB141	Grt4	0.2	-26.3531	0.503664
15DB141	Grt4	0.3	-23.2365	0.434021
15DB141	Grt4	0.4	-20.1198	0.398688
15DB141	Grt4	0.5	-17.0032	0.377323
15DB141	Grt4	0.6	-13.8866	0.363009
15DB141	Grt4	0.7	-10.7699	0.35275
15DB141	Grt4	0.8	-7.65328	0.345038
15DB141	Grt4	0.9	-4.53664	0.339027
15DB141	Grt4	1	-1.42	0.334212
15DB141	Grt1	0	-32.5864	7.66326
15DB141	Grt1	0.1	-26.6747	0.496323
15DB141	Grt1	0.2	-20.7631	0.430374
15DB141	Grt1	0.3	-14.8515	0.408121
15DB141	Grt1	0.4	-8.93983	0.396942
15DB141	Grt1	0.5	-3.02819	0.390219
15DB141	Grt1	0.6	2.88345	0.38573
15DB141	Grt1	0.7	8.79509	0.38252
15DB141	Grt1	0.8	14.7067	0.38011
15DB141	Grt1	0.9	20.6184	0.378235
15DB141	Grt1	1	26.53	0.376735
15DB141	Grt2	0	-32.5864	7.66326
15DB141	Grt2	0.1	-24.7727	0.474361
15DB141	Grt2	0.2	-16.9591	0.420912
15DB141	Grt2	0.3	-9.14547	0.402919
15DB141	Grt2	0.4	-1.33183	0.393889
15DB141	Grt2	0.5	6.48181	0.38846
15DB141	Grt2	0.6	14.2954	0.384836
15DB141	Grt2	0.7	22.1091	0.382245
15DB141	Grt2	0.8	29.9227	0.380301
15DB141	Grt2	0.9	37.7364	0.378788
15DB141	Grt2	1	45.55	0.377577
15DB141	Grt3	0	-32.5864	7.66326
15DB141	Grt3	0.1	-22.7427	0.450906
15DB141	Grt3	0.2	-12.8991	0.410584
15DB141	Grt3	0.3	-3.05547	0.397043
15DB141	Grt3	0.4	6.78817	0.390253
15DB141	Grt3	0.5	16.6318	0.386174
15DB141	Grt3	0.6	26.4754	0.383451
15DB141	Grt3	0.7	36.3191	0.381505
15DB141	Grt3	0.8	46.1627	0.380045
15DB141	Grt3	0.9	56.0064	0.378909
15DB141	Grt3	1	65.85	0.378
15DB141	Grt4	0	-32.5864	7.66326
15DB141	Grt4	0.1	-27.3047	0.526151
15DB141	Grt4	0.2	-22.0231	0.445525
15DB141	Grt4	0.3	-16.7415	0.418244
15DB141	Grt4	0.4	-11.4598	0.404525
15DB141	Grt4	0.5	-6.17819	0.396269
15DB141	Grt4	0.6	-0.896553	0.390755
15DB141	Grt4	0.7	4.38509	0.386811
15DB141	Grt4	0.8	9.66672	0.38385
15DB141	Grt4	0.9	14.9484	0.381546
15DB141	Grt4	1	20.23	0.379701
15DB141	Grt2	0	-32.5864	7.66326
15DB141	Grt2	0.1	-26.4327	0.506949
15DB141	Grt2	0.2	-20.2791	0.427665
15DB141	Grt2	0.3	-14.1255	0.400845
15DB141	Grt2	0.4	-7.97183	0.387361
15DB141	Grt2	0.5	-1.81819	0.379246
15DB141	Grt2	0.6	4.33545	0.373826
15DB141	Grt2	0.7	10.4891	0.369949
15DB141	Grt2	0.8	16.6427	0.367039
15DB141	Grt2	0.9	22.7964	0.364775
15DB141	Grt2	1	28.95	0.362962
15DB141	Grt3	0	-32.5864	7.66326
15DB141	Grt3	0.1	-26.6717	0.498906
15DB141	Grt3	0.2	-20.7571	0.414871
15DB141	Grt3	0.3	-14.8425	0.386419
15DB141	Grt3	0.4	-8.92783	0.372109
15DB141	Grt3	0.5	-3.01319	0.363496
15DB141	Grt3	0.6	2.90145	0.357743
15DB141	Grt3	0.7	8.81609	0.353628
15DB141	Grt3	0.8	14.7307	0.350539
15DB141	Grt3	0.9	20.6454	0.348134
15DB141	Grt3	1	26.56	0.346209
15DB141	Grt4	0	-32.5864	7.66326
15DB141	Grt4	0.1	-26.1747	0.492138
15DB141	Grt4	0.2	-19.7631	0.419251
15DB141	Grt4	0.3	-13.3515	0.394625
15DB141	Grt4	0.4	-6.93983	0.382249
15DB141	Grt4	0.5	-0.528191	0.374803
15DB141	Grt4	0.6	5.88345	0.369831
15DB141	Grt4	0.7	12.2951	0.366275
15DB141	Grt4	0.8	18.7067	0.363606
15DB141	Grt4	0.9	25.1184	0.361529
15DB141	Grt4	1	31.53	0.359866

## Sheet: Table S10
Table S10. Modeling results for peritectic garnet entrainment.
Garnet-clean melt endmember	Entrainment peritectic garnet	Amount of entrainment peritectic garnet (wt.%)	εHf(t)	(Gd/Lu)N
04HZ44a-B-W-derived melt (E1-M)	E1-PG	0	-0.2125	0.72721
04HZ44a-B-W-derived melt (E1-M)	E1-PG	0.1	-0.2125	0.32933
04HZ44a-B-W-derived melt (E1-M)	E1-PG	0.2	-0.2125	0.26901
04HZ44a-B-W-derived melt (E1-M)	E1-PG	0.3	-0.2125	0.24462
04HZ44a-B-W-derived melt (E1-M)	E1-PG	0.4	-0.2125	0.23143
04HZ44a-B-W-derived melt (E1-M)	E1-PG	0.5	-0.2125	0.22316
04HZ44a-B-W-derived melt (E1-M)	E1-PG	0.6	-0.2125	0.21749
04HZ44a-B-W-derived melt (E1-M)	E1-PG	0.7	-0.2125	0.21337
04HZ44a-B-W-derived melt (E1-M)	E1-PG	0.8	-0.2125	0.21023
04HZ44a-B-W-derived melt (E1-M)	E1-PG	0.9	-0.2125	0.20776
04HZ44a-B-W-derived melt (E1-M)	E1-PG	1	-0.2125	0.20577
04HZ15a-B-W-derived melt (E2-M)	E2-PG	0	-15.9655	0.64874
04HZ15a-B-W-derived melt (E2-M)	E2-PG	0.1	-15.9655	0.29379
04HZ15a-B-W-derived melt (E2-M)	E2-PG	0.2	-15.9655	0.23998
04HZ15a-B-W-derived melt (E2-M)	E2-PG	0.3	-15.9655	0.21822
04HZ15a-B-W-derived melt (E2-M)	E2-PG	0.4	-15.9655	0.20645
04HZ15a-B-W-derived melt (E2-M)	E2-PG	0.5	-15.9655	0.19908
04HZ15a-B-W-derived melt (E2-M)	E2-PG	0.6	-15.9655	0.19402
04HZ15a-B-W-derived melt (E2-M)	E2-PG	0.7	-15.9655	0.19034
04HZ15a-B-W-derived melt (E2-M)	E2-PG	0.8	-15.9655	0.18754
04HZ15a-B-W-derived melt (E2-M)	E2-PG	0.9	-15.9655	0.18534
04HZ15a-B-W-derived melt (E2-M)	E2-PG	1	-15.9655	0.18356
04SM20a-B-W-derived melt (E3-M)	E3-PG	0	-21.129	0.52275
04SM20a-B-W-derived melt (E3-M)	E3-PG	0.1	-21.129	0.23673
04SM20a-B-W-derived melt (E3-M)	E3-PG	0.2	-21.129	0.19337
04SM20a-B-W-derived melt (E3-M)	E3-PG	0.3	-21.129	0.17584
04SM20a-B-W-derived melt (E3-M)	E3-PG	0.4	-21.129	0.16636
04SM20a-B-W-derived melt (E3-M)	E3-PG	0.5	-21.129	0.16042
04SM20a-B-W-derived melt (E3-M)	E3-PG	0.6	-21.129	0.15634
04SM20a-B-W-derived melt (E3-M)	E3-PG	0.7	-21.129	0.15338
04SM20a-B-W-derived melt (E3-M)	E3-PG	0.8	-21.129	0.15112
04SM20a-B-W-derived melt (E3-M)	E3-PG	0.9	-21.129	0.14935
04SM20a-B-W-derived melt (E3-M)	E3-PG	1	-21.129	0.14791
TH12-B-W-derived melt (E4-M)	E4-PG	0	-10.8349	1.21039
TH12-B-W-derived melt (E4-M)	E4-PG	0.1	-10.8349	0.54814
TH12-B-W-derived melt (E4-M)	E4-PG	0.2	-10.8349	0.44774
TH12-B-W-derived melt (E4-M)	E4-PG	0.3	-10.8349	0.40715
TH12-B-W-derived melt (E4-M)	E4-PG	0.4	-10.8349	0.3852
TH12-B-W-derived melt (E4-M)	E4-PG	0.5	-10.8349	0.37143
TH12-B-W-derived melt (E4-M)	E4-PG	0.6	-10.8349	0.362
TH12-B-W-derived melt (E4-M)	E4-PG	0.7	-10.8349	0.35513
TH12-B-W-derived melt (E4-M)	E4-PG	0.8	-10.8349	0.34991
TH12-B-W-derived melt (E4-M)	E4-PG	0.9	-10.8349	0.3458
TH12-B-W-derived melt (E4-M)	E4-PG	1	-10.8349	0.34249
15DB141	E1-PG	0	-32.5864	7.66326
15DB141	E1-PG	0.1	-32.5864	0.93872
15DB141	E1-PG	0.2	-32.5864	0.55034
15DB141	E1-PG	0.3	-32.5864	0.41071
15DB141	E1-PG	0.4	-32.5864	0.33882
15DB141	E1-PG	0.5	-32.5864	0.295
15DB141	E1-PG	0.6	-32.5864	0.2655
15DB141	E1-PG	0.7	-32.5864	0.24427
15DB141	E1-PG	0.8	-32.5864	0.22828
15DB141	E1-PG	0.9	-32.5864	0.21579
15DB141	E1-PG	1	-32.5864	0.20577
15DB141	E2-PG	0	-32.5864	7.66326
15DB141	E2-PG	0.1	-32.5864	1.23246
15DB141	E2-PG	0.2	-32.5864	0.68913
15DB141	E2-PG	0.3	-32.5864	0.48702
15DB141	E2-PG	0.4	-32.5864	0.38151
15DB141	E2-PG	0.5	-32.5864	0.3167
15DB141	E2-PG	0.6	-32.5864	0.27285
15DB141	E2-PG	0.7	-32.5864	0.24121
15DB141	E2-PG	0.8	-32.5864	0.2173
15DB141	E2-PG	0.9	-32.5864	0.19859
15DB141	E2-PG	1	-32.5864	0.18356
15DB141	E3-PG	0	-32.5864	7.66326
15DB141	E3-PG	0.1	-32.5864	1.44729
15DB141	E3-PG	0.2	-32.5864	0.78678
15DB141	E3-PG	0.3	-32.5864	0.53427
15DB141	E3-PG	0.4	-32.5864	0.40093
15DB141	E3-PG	0.5	-32.5864	0.31851
15DB141	E3-PG	0.6	-32.5864	0.26251
15DB141	E3-PG	0.7	-32.5864	0.22199
15DB141	E3-PG	0.8	-32.5864	0.1913
15DB141	E3-PG	0.9	-32.5864	0.16726
15DB141	E3-PG	1	-32.5864	0.14791
15DB141	E4-PG	0	-32.5864	7.66326
15DB141	E4-PG	0.1	-32.5864	1.57698
15DB141	E4-PG	0.2	-32.5864	0.94786
15DB141	E4-PG	0.3	-32.5864	0.70822
15DB141	E4-PG	0.4	-32.5864	0.58187
15DB141	E4-PG	0.5	-32.5864	0.50384
15DB141	E4-PG	0.6	-32.5864	0.45085
15DB141	E4-PG	0.7	-32.5864	0.41252
15DB141	E4-PG	0.8	-32.5864	0.3835
15DB141	E4-PG	0.9	-32.5864	0.36077
15DB141	E4-PG	1	-32.5864	0.34249

[truncated: 3 more sheets: Table S11, Table S12, G50914]
